# Supplementary material for: Anti‐tumor effects of PIM/PI3K/mTOR triple kinase inhibitor IBL‐302 in neuroblastoma
Source: PubMed Central journal article supplement (PMC6685085; doi:10.15252/emmm.201810058), 2019-07-16
Supplement: EMMM-11-e10058-s001.pdf [file EMMM-11-e10058-s001.pdf]

**EMM-2018-10058\_Mohlin et al**

**Appendix**

## **Table of Contents**

### **Appendix Fig S1.**

*Relates to Fig. 2.*

### **Appendix Fig S2.**

*Relates to Fig. 4.*

### **Appendix Fig S3.**

*Relates to Fig. 6.*

**Appendix Table S1.** *Overview of PDX characteristics.*

**Appendix Table S2.** *IBL-202 and IBL-301 GI<sub>50</sub> ranges.*

**Appendix Table S3.** *Primer sequences used for quantitative RT-PCR.*

**Appendix Table S4.** *Detailed information on antibodies used for western blot and immunohistochemistry.*

**Appendix Supplementary Methods.** *Generation of compounds and Mass spectrometry.*

**Appendix Supplementary Materials.** *Raw screening data.*

## Appendix Figure Legends

**Appendix Fig S1.** *PIM isoforms are expressed in neuroblastoma PDX cells.* **A-B.** *PIM1 (A)* and *PIM3 (B)* relative mRNA expression in LU-NB-2 and LU-NB-3 PDX cells and conventional cell line SK-N-BE(2)c determined by qRT-PCR. Data represents mean of n=3 biologically independent experiments and error bars represent SEM. **C-D.** Overall survival data for *PIM1 (C)* and *PIM3 (D)* in the publicly available datasets SEQC498 and Versteeg88 (R2: microarray analysis and visualization platform; <http://r2.amc.nl>). **E-I.** Sensitivity towards designated PI3K only inhibitors in cell lines from various tumor types as displayed by GI<sub>50</sub>. Arrows indicate box plot for neuroblastoma.

**Appendix Fig S2.** *Treatment with IBL-302 induces differentiation and downregulates N-Myc.* **A-B.** Western blot analyses of downstream signaling protein (pAkt(Ser473) and pAkt(Thr308)) expression in LU-NB-2 cells after treatment with IBL-302 at indicated concentrations for 48 hours. Total Akt and Actin levels were used as loading controls. **C.** Brightfield photomicrographs of SK-N-SH cells treated with 50nM IBL-302 for 48 hours and quantification of neurite outgrowth presented as number of neurites. Representative areas (n=4 and n=7 for CTRL and IBL-302 respectively) were used and n=135 and n=144 cells/condition for CTRL and IBL-301, respectively, were counted. Statistical significance was determined by two-sided student's t-test. p=0.03. Scale bars represent 100µm. **D.** Weight of individual mice in control (n=5) or IBL-302 (n=5) treated groups over the course of 35 days (or until the mice were sacrificed due to tumor burden). **E.** Tumor size correlating to Fig. 5H.

**Appendix Fig. S3.** *IBL-302 potentiates the effect of doxorubicin and etoposide.* **A-B.** LU-NB-3 PDX cells were treated with indicated concentrations of chemotherapy (doxorubicin (A) or etoposide (B), respectively) and/or 50nM IBL-302 for 48 hours. Graphs show mean values and SEM from three independent experiments. **C.** Weight of individual mice in control (n=5), IBL-302 (n=5), cisplatin (n=5) or combination (n=5) treated groups over the course of 70 days (or until the mice were sacrificed due to tumor burden).

**Appendix Table S1.** Overview of PDX characteristics. *AG*; adrenal gland, *UD*; undifferentiated, *PD*; poorly differentiated.

**Appendix Table S2.** IBL-202, IBL-301 and IBL-302 GI<sub>50</sub> ranges.

**Appendix Table S3.** Primer sequences used for quantitative RT-PCR.

**Appendix Table S4.** Detailed information on antibodies used for western blot, immunohistochemistry and immunofluorescence.

**Appendix Supplementary Methods.** Detailed generation of compounds and mass spectrometry methods.

**Appendix Supplementary Materials.** Raw data from IBL-302 screening across 707 cell lines from 47 tumor forms and a separate panel of 16 neuroblastoma cell lines.

## Appendix Supplementary Methods

### *Generation of compounds*

**General Procedures:** Chemicals were purchased from Aldrich Chemical Company Ltd., Apollo Scientific Ltd and TCI Europe N.V. Unless otherwise stated, commercial chemicals and solvents were used without further purification. Anhydrous DMF, DCM, toluene, MeOH, dioxane, acetonitrile, DIPEA and DME were purchased from Aldrich in Sure Seal™ bottle and kept under nitrogen. Proton (<sup>1</sup>H) NMR spectra were recorded on Bruker Avance II 300 MHz spectrometer using DMSO-*d*<sub>6</sub>, CDCl<sub>3</sub>, CD<sub>3</sub>OD as solvent. Chemical shifts are expressed in parts per million (ppm) (δ relative to residual solvent peak for <sup>1</sup>H). Multiplicities are indicated by s (singlet), d (doublet), t (triplet), q (quartet), m (multiplet), br (broad) or combination thereof. The HPLC measurements were performed using a HP 1100 from Agilent Technologies comprising a pump (binary) with degasser, an autosampler, a column oven, a diode-array detector (DAD) and a column Gemini-NX C18 (100 x 2.0 mm; 5 μm particle size). Eluent A, water with 0.1% formic acid; eluent B: acetonitrile with 0.1% formic acid. Gradient 5% to 100% of B within 8 min at 50 °C, DAD. Flow from the column was split to a MS spectrometer. The MS detector was configured with an electrospray ionization source or API/APCI. Nitrogen was used as the nebulizer gas. Data acquisition was performed with ChemStation LC/MSD quad, software. Purities of all reported compounds were greater than 95% based on HPLC chromatograms obtained on an Agilent HP 1100 LCMS system. All final compounds were purified to have purity higher than 95% by reverse phase high performance liquid chromatography (HPLC), or normal phase silica gel chromatography flash chromatography employing Biotage apparatus medium pressure liquid chromatography system SP4 or Isolera™ Prime, using ExtraBond Flash SLL with spacer SI (12 g, 20 g, 40 g, 80 g or 120 g). Thin layer chromatography (TLC) was performed on 20 mm precoated plates of silica gel (Merck, silica gel 60F254); visualization was achieved using ultraviolet light (254 nm).

**Abbreviations:** The term “BOC” means tert-butyloxycarbonyl protecting group; “DCM” means dichloromethane; “DCE” means dichloroethane; “MeOH” means methanol; “THF” means tetrahydrofuran; “DMF” means dimethylformamide; “DME” means 1,2-dimethoxyethane; “EtOAc” means ethyl acetate; “CH<sub>3</sub>CN” means acetonitrile; “DIPEA” means diisopropylethylamine; “LDA” means lithium diisopropyl amide; “TFA” means trifluoroacetic acid; “HATU” means O-(7-azabenzotriazole-1-yl)-1,1,3,3-tetramethyluronium hexafluorophosphate; “PdCl<sub>2</sub>(PPh<sub>3</sub>)<sub>2</sub>” means Bis(triphenylphosphine)palladium(II) dichloride;

“HOAt” means 1-Hydroxy-7-azabenzotriazole; “RT” means room temperature; “min” means minutes; “sat.” means saturated; “aq.” means aqueous; eq. means equivalents.

**General Synthetic Route to synthesize IBL-301, IBL-302 and IBL-202 (see also Figure 1A):**

**3-Formylamino-4-methyl-thiophene-2-carboxylic acid methyl ester (1):** Formic acid (24 mL) was added dropwise at 0°C to acetic anhydride (36 mL). Methyl 3-amino-4-methylthiophene-2-carboxylate (10 g, 58.4 mmol) was added portion wise at 0°C and the mixture was stirred at RT for 18 hours. The mixture was poured into a solution of Na<sub>2</sub>CO<sub>3</sub> (60 g) in water (200 mL) cooled to 0°C. The resulting white solid was then filtered off, washed with water and dried to give a white solid (**1**, 11 g), Y: 94%. <sup>1</sup>H NMR (300 MHz, DMSO) δ 9.85 (s, 1H), 8.24 (s, 1H), 7.55 (s, 1H), 3.76 (s, 3H), 2.07 (s, H). **7-Methyl-3H-thieno[3,2-d]pyrimidin-4-one (2):** A mixture of starting material **1** (11 g, 55.21 mmol, 1 eq.) and ammonium formate (27.85 g, 441.70 mmol, 8 eq.) in formamide (13 mL) was heated at 160°C for 18 hours. On cooling to room temperature, water was added, and the resulting solid was filtered, washed off with water and dried to yield compound **2**, as a white solid (7.06 g, 77%). <sup>1</sup>H NMR (300 MHz, DMSO) δ 8.18 (s, 1H), 7.81 (s, 1H), 2.31 (s, 3H). **4-Chloro-7-methylthieno[3,2-d]pyrimidine (3):** A mixture of **2**, 10.2 g and POCl<sub>3</sub> (50 mL) was refluxed for 3 hours. Upon cooling, the solvents were removed in vacuo, and the residue suspended in cold water. Aqueous saturated Na<sub>2</sub>CO<sub>3</sub> was added up to pH~8 at 0°C. The resulting solid was filtered off, washed with water and dried, yielding compound **3**: 10.69 g, Y: 94%. <sup>1</sup>H NMR (300 MHz, DMSO) δ 9.01 (s, 1H), 8.19 (q, J = 1.1 Hz, 1H), 2.39 (d, J = 1.1 Hz, 3H). **4-Chloro-6-iodo-7-methyl-thieno[3,2-d]pyrimidine (4):** LDA (1.8 M in tetrahydrofuran, 38.45 ml, 69.189 mmol) was added to a mixture of **3** (8.87 g, 48.048 mmol) in THF (320 ml) at -78°C. The mixture was stirred at -78°C for 2 hours, then a solution of I<sub>2</sub> (18.30 g, 72.072 mmol) in THF (44.40 ml) was added slowly, via canula. The reaction was stirred at -78°C for 2 hours. EtOAc was added to the mixture at -78°C followed by the addition of an aq. saturated solution of Na<sub>2</sub>S<sub>2</sub>O<sub>3</sub>. Aq. layer was extracted with EtOAc. The combined organic layers were washed with brine, dried (Na<sub>2</sub>SO<sub>4</sub>), filtered and concentrated to obtain desired product **4** as a pale brown solid (17 g, quantitative). <sup>1</sup>H NMR (300 MHz, CDCl<sub>3</sub>) δ 8.85 (s, 1H), 2.40 (s, 3H). **5-(4-Chloro-7-methyl-thieno[3,2-d]pyrimidin-6-yl)-2-methoxy-pyridin-3-ylamine (5):** The reaction was carried out in two batches (2 x 7.38 g). Sealed tubes charged with compound **4** (7.38 g, 19.885 mmol theoretic) in 1,4-dioxane (155 ml), (5-amino-6-methoxypyridin-3-yl)boronic acid pinacol ester (5.97 g, 23.861 mmol), Na<sub>2</sub>CO<sub>3</sub> 2M (52 ml) and dichlorobis(triphenylphosphine)palladium(II) (1.41 g,

1.988 mmol) were heated at 100°C for 1 hour. The reaction was concentrated and the crude from both batches was purified by Biotage Flash Chromatography (in silica gel) using Cyclohexane-EtOAc gradient from 0% to 20% to give desired compound **5** (7.99 g, 13.453 mmol). <sup>1</sup>H NMR (300 MHz, CDCl<sub>3</sub>) δ 8.94 (s, 1H), 7.78 (s, 1H), 7.08 (s, 1H), 4.09 (s, 3H), 2.49 (s, 3H). **{5-[6-(5-Amino-6-methoxy-pyridin-3-yl)-7-methyl-thieno[3,2-d]pyrimidin-4-yl]-thiophen-2-ylmethyl}-carbamic acid tert-butyl ester (6)**: A mixture of compound **5** (1.0 g, 3.22 mmol), 5-(boc-aminomethyl)thiophene-2-boronic acid (1.0 g, 3.82 mmol), saturated aqueous solution of sodium carbonate (5 mL) and PdCl<sub>2</sub>[PPh<sub>3</sub>]<sub>2</sub> (270 mg) in degassed DME (100 mL) was refluxed for 5 hours under nitrogen. On cooling to room temperature, the solvents were removed in vacuo to give a residue that was purified by column chromatography (cyclohexane/EtOAc 75 to 100% mixtures as eluents) to give desired product **6** as a yellow solid (1.465 g, 90% yield). <sup>1</sup>H NMR (300 MHz, DMSO) δ 9.14 (s, 1H), 7.93 (d, J = 3.8 Hz, 1H), 7.75 (d, J = 2.2 Hz, 1H), 7.63 (t, J = 5.6 Hz, 3H), 7.23 (d, J = 2.2 Hz, 1H), 7.17 (d, J = 3.8 Hz, 1H), 5.33 (s, 2H), 4.37 (d, J = 5.6 Hz, 2H), 3.96 (s, 3H), 2.52 (s, 3H), 1.41 (s, 9H). **3-(5-{4-[5-(tert-Butoxycarbonylamino-methyl)-thiophen-2-yl]-7-methyl-thieno[3,2-d] pyrimidin-6-yl}-2-methoxy-pyridin-3-yl)sulfamoyl)-benzoic acid methyl ester (7)**: The reaction was carried out in two batches of 5 g each. To a solution of starting material **6** (5 g, 10.339 mmol) in pyridine (73.0 ml) methyl 3-(chlorosulfonyl)benzoate (3.06 g, 12.407 mmol) was added at 0°C. The reaction mixture was stirred for 1 hour at 0 °C. The reaction was quenched with MeOH and stirred for 30 min at 0°C. The solvent was evaporated and the crude from all batches was purified by Biotage Flash Chromatography (in silica gel) using Cyclohexane-EtOAc gradient from 0% to 100% to give desired product **7** (6.980 g, 46%). <sup>1</sup>H NMR (300 MHz, MeOD) δ 8.89 (s, 1H), 8.45 (s, 1H), 8.20 (d, J = 7.8 Hz, 1H), 8.09 – 8.00 (m, 2H), 7.95 (s, 1H), 7.76 (s, 1H), 7.69 – 7.50 (m, 2H), 7.14 (ddd, J = 20.9, 13.5, 5.5 Hz, 1H), 4.44 (s, 2H), 3.89 (s, 3H), 3.79 (s, 3H), 2.38 (s, 3H), 1.48 (s, 9H). **3-(5-{4-[5-(tert-Butoxycarbonylamino-methyl)-thiophen-2-yl]-7-methyl-thieno[3,2-d] pyrimidin-6-yl}-2-methoxy-pyridin-3-yl)sulfamoyl)-benzoic acid (8)**: The reaction was carried out in two batches of 3.20 g each. To a solution of starting material **7** (3.20 g, 4.695 mmol) in 1,4-dioxane (46 ml), water (23 ml) was added to RT lithium hydroxide monohydrate (2.0 g, 46.95 mmol). The reaction mixture was stirred for 1 hour. The reaction mixture was concentrated and the crude from both batches was purified by Biotage Flash Chromatography (silica gel) using Cyclohexane-EtOAc gradient from 0% - 100% then EtOAc-MeOH gradient from 5 % - 60 % to give desired compound **8** (5.79 g, 8.67 mmol, 90 %). <sup>1</sup>H NMR (300 MHz, DMSO) δ 9.12 (s, 1H), 8.35 (t, J = 1.6 Hz, 1H), 8.07 (d, J = 7.2 Hz,

1H), 7.97 (d, J = 7.9 Hz, 2H), 7.91 (d, J = 3.9 Hz, 1H), 7.62 (m, 4H), 7.20 (d, J = 3.9 Hz, 1H), 4.38 (d, J = 6.0 Hz, 2H), 3.78 (s, 3H), 2.36 (s, 3H), 1.41 (s, 9H). **5-{5-[4-(5-Aminomethylthiophen-2-yl)-7-methyl-thieno[3,2-d]pyrimidin-6-yl]-2-methoxy-pyridin-3-ylsulfamoyl}-2-methoxy-benzoic acid (9)**: To a solution of **8** (5.79 g, 8.666 mmol) in DCM (70 ml) at 0 °C TFA (102 ml) was added dropwise. The reaction mixture was stirred for 1 hour at RT. The reaction mixture was concentrated and co-evaporated with toluene (three times) yielding a yellow solid, compound **9** (10.94 g) which was used in the next step without further purification.

**5-{5-[4-(5-tert-Butoxyarboxyaminoethylthiophen-2-yl)-7-methyl-thieno[3,2-d]pyrimidin-6-yl]-2-methoxy-pyridin-3-ylsulfamoyl}-2-fluoro-benzoic acid (10)**: 5-(Chlorosulfonyl)-2-fluorobenzoic acid (366 mg, 1.55 mmol) was added portion wise to a solution of compound **6** (500 mg, 1.03 mmol) in pyridine (20 mL) cooled to 0°C and the mixture was stirred for 24 hours at RT. The solvents were removed in vacuo and the residue was purified by column chromatograph (EtOAc/MeOH 0 to 30% as eluents) to give compound **10** as a yellow solid (210 mg). <sup>1</sup>H NMR (300 MHz, DMSO) δ 9.14 (s, 1H), 8.23 (d, J = 5.2 Hz, 1H), 8.14 (m, 1H), 7.93 (d, J = 3.8 Hz, 1H), 7.88 (m, 1H), 7.67 (s, 2H), 7.40 (s, 1H), 7.19 (d, J = 3.9 Hz, 1H), 4.38 (d, J = 6.2 Hz, 2H), 3.80 (s, 3H), 2.42 (s, 3H), 1.42 (s, 9H).

**5-{5-[4-(5-Aminomethylthiophen-2-yl)-7-methyl-thieno[3,2-d]pyrimidin-6-yl]-2-methoxy-pyridin-3-ylsulfamoyl}-2-fluoro-benzoic acid (11)**: Compound **10** (210 mg, 0.3 mmol) was resuspended in DCE (5 mL), TFA (5 mL) was added and the mixture cooled to 0°C. The mixture was stirred for 4 hours at RT and the solvents were removed in vacuo to give compound **11** as a brown solid (300 mg).

**7-Chloro-2-iodo-3-methyl-thieno[3,2-b]pyridine (12)**: LDA (1.8 M in tetrahydrofuran 0.73 ml, 1.307 mmol) was added to a mixture of 7-chloro-3-methylthieno[3,2-b]pyridine (206 mg, 1.089 mmol) in THF (7.2 ml) at -78°C. The mixture was stirred at -78°C for 1 hour, then a solution of I<sub>2</sub> (345.0 mg, 1.361 mmol) in THF (1.0 ml) was added slowly. The reaction was stirred at -78°C for 1 hour. EtOAc was added to the mixture at -78°C followed by the addition of an aq. saturated solution of Na<sub>2</sub>S<sub>2</sub>O<sub>3</sub>. Aq layer was extracted with EtOAc. The combined organic layers were washed with brine, dried (Na<sub>2</sub>SO<sub>4</sub>), filtered and concentrated. The residue was triturated from CH<sub>3</sub>CN to give the desired product **12** as a pale-yellow solid (291 mg, 0.940 mmol, 86%). LCMS (ESI): m/z 309.9/311.9 [M+ H]<sup>+</sup>, Rt: 4.91 min.

**5-(7-Chloro-3-methyl-thieno[3,2-b]pyridin-2-yl)-2-methoxy-pyridin-3-ylamine (13)**: A mixture of compound **12** (100 mg, 0.323 mmol), (5-amino-6-methoxypyridin-3-yl)boronic acid pinacol ester (97 mg, 0.388 mmol), Na<sub>2</sub>CO<sub>3</sub> 2M (0.84 ml), dichlorobis(triphenylphosphine)palladium(II) (23 mg, 0.032 mmol) in 1,4-dioxane (2.52 ml) was heated at 100°C for 1 hour in a sealed tube. The solvent was concentrated in vacuo and the



crude was purified by Biotage Flash Chromatography (silica gel) using Cyclohexane-EtOAc gradient from 0% - 30% to give desired product **13** pure (83 mg, 0.271 mmol, 84 %). LCMS (ESI): m/z 306.7 [M+ H]<sup>+</sup>, Rt: 4.62 min. **5-[2-(5-Amino-6-methoxy-pyridin-3-yl)-3-methyl-thieno[3,2-b]pyridin-7-yl]-thiophen-2-ylmethyl}-carbamic acid tert-butyl ester (14)**: The reaction was carried out in two batches. Sealed tube charged with product **13** (597 mg, 1.952 mmol) in dioxane (15.25 ml), 5-(BOC-aminomethyl)thiophene-2-boronic acid (614 mg, 2.343 mmol), Na<sub>2</sub>CO<sub>3</sub> 2M (5.10 ml) and dichlorobis(triphenylphosphine)palladium(II) (138 mg, 0.195 mmol) was heated at 100°C for 1 hour. Excess of reagents were added til almost completion of the reaction. The reaction was concentrated and the crude from both batches was purified in Biotage chromatography (silica gel) cyclohexane-EtOAc, 0% - 50% to give 2.08 g of compound **14** with traces of triphenylphosphine oxide. LCMS (ESI): m/z 483.6 [M+ H]<sup>+</sup>, Rt: 4.78 min. **3-(5-{7-[5-(tert-Butoxycarbonylamino-methyl)-thiophen-2-yl]-3-methyl-thieno[3,2-b] pyridin-2-yl}-2-methoxy-pyridin-3-ylsulfamoyl)-benzoic acid methyl ester (15)**: To a solution of **14** (370 mg, 0.767 mmol) in pyridine (5.40 ml) methyl 3-(chlorosulfonyl)benzoate (216 mg, 0.920 mmol) was added at 0°C. The reaction mixture was stirred for 1 hour at 0°C. The reaction mixture was quenched with MeOH and stirred for 30 min at 0°C. The solvent was evaporated, and the crude was purified by Biotage Flash Chromatography (silica gel) using Cyclohexane-EtOAc gradient from 0% - 60% to give desired product **15** (249 mg, 0.366 mmol, 48 %). LCMS (ESI): m/z 681.8 [M+ H]<sup>+</sup>, Rt: 5.06 min. **3-(5-{7-[5-(tert-Butoxycarbonylamino-methyl)-thiophen-2-yl]-3-methyl-thieno[3,2-b]pyridin-2-yl}-2-methoxy-pyridin-3-ylsulfamoyl)-benzoic acid (16)**: To a solution of **15** (249 mg, 0.366 mmol) in 1,4-dioxane (3.59 ml) water (1.78 ml) was added to room temperature lithium hydroxide monohydrate (156 mg, 3.657 mmol). The reaction mixture was stirred for 1 hour and excess of base was again added (156 mg), stirring at RT for additional 30 min. The reaction mixture was concentrated, and the crude was purified by Biotage Flash Chromatography (silica gel) using Cyclohexane-EtOAc gradient from 0% - 100% then EtOAc-MeOH gradient from 0% - 30 % to give compound **16** (199 mg, 0.298 mmol, 82 %). LCMS (ESI): m/z 667.8 [M+ H]<sup>+</sup>, Rt: 4.79 min. **3-{5-[7-(5-Aminomethyl-thiophen-2-yl)-3-methyl-thieno[3,2-b]pyridin-2-yl]-2-methoxy-pyridin-3-ylsulfamoyl}-benzoic acid (17)**: To a solution of **16** (598 mg, 0.897 mmol) in DCM (7.10 ml) TFA (10.50 ml) was added dropwise at 0°C. The reaction mixture was stirred for 1 hour at RT. The reaction mixture was concentrated and co-evaporated with toluene yielding yellow solid crude which was used in the next step without further purification as compound **17**. A small portion of the compound was purified by HPLC yielding pure white solid **17**, <sup>1</sup>H NMR (300 MHz, DMSO) δ 8.73 (d, J = 5.1 Hz, 1H), 8.67 (s, 1H), 8.15

(m, 2H), 7.97 (d, J = 8.1 Hz, 1H), 7.93 (d, J = 3.8 Hz, 1H), 7.87 (d, J = 5.1 Hz, 1H), 7.59 (t, J = 7.7 Hz, 1H), 7.50 (d, J = 2.1 Hz, 1H), 7.39 (d, J = 3.7 Hz, 1H), 4.51 (s, 2H), 3.97 (s, 3H), 2.50 (s, 3H, under solvent signal). LCMS (ESI): m/z 567.1 [M+ H]<sup>+</sup>, Rt: 3.27 min.

**IBL-301:** The reaction carried 18 batches of 730 mg each. Compound **9** (730 mg, 0.578 mmol theoretic) was dissolved in DMF (20 ml) and DIPEA (0.93 ml, 5.351 mmol). The material was slowly added (syringe pump; 3.5 mL/h) to a solution of HATU (449 mg, 1.156 mmol) and HOAt (0.5 M in DMF, 2.31 ml, 1.156 mmol) in DMF (70 ml). After addition, the reaction was stirred for 10 hours, then evaporated and the crude was purified by Biotage Flash Chromatography (silica gel) using Cyclohexane-EtOAc gradient from 0% - 100% followed by EtOAc -MeOH gradient from 5% - 10% to yield a product that was filtered and washed with MeOH and CH<sub>3</sub>CN to give pure compound **IBL-301** (511 mg, 0.930 mmol). <sup>1</sup>H NMR (300 MHz, DMSO) δ 10.79 (s, 1H), 9.89 (t, J = 5.5 Hz, 1H), 9.17 (s, 1H), 8.60 (s, 1H), 8.36 (s, 1H), 8.26 (d, J = 7.8 Hz, 1H), 8.19 (d, J = 7.8 Hz, 1H), 7.91 (d, J = 3.7 Hz, 1H), 7.85 (t, J = 7.6 Hz, 1H), 7.61 (s, 1H), 7.25 (d, J = 3.6 Hz, 1H), 4.83 (d, J = 4.8 Hz, 2H), 4.05 (s, 3H), 2.60 (s, 3H). LCMS (ESI): m/z 550.1 [M+ H]<sup>+</sup>, Rt: 4.99 min. **IBL-302:** A mixture of compound **11** (300 mg, 0.43 mmol) and DIPEA (0.6 mL) in dry DMF (60 mL) was added dropwise at room temperature for a 1.5 hours period over a solution of 1-hydroxy-7-azabenzotriazole (0.6 M solution in DMF; 1.96 mL) and HATU (443 mg) in DMF (150 mL). The mixture was stirred for 24 hours at RT and the solvents removed in vacuo to give a residue that was triturated from water to give a brown solid that was further purified by column chromatography (DCM/MeOH 0 to 20% mixtures as eluents) to give a brown solid (53 mg) that was recrystallized from MeCN/water to give compound **IBL-302** as a pale brown solid (39 mg). <sup>1</sup>H NMR (300 MHz, DMSO) δ 10.80 (s, 1H), 9.58 (t, J = 5.2 Hz, 1H), 9.18 (s, 1H), 8.48 (dd, J = 6.4, 2.5 Hz, 1H), 8.37 (s, 1H), 8.32 (dd, J = 7.4, 3.0 Hz, 1H), 7.93 (d, J = 3.7 Hz, 1H), 7.77 (t, J = 9.5 Hz, 1H), 7.73 (d, J = 2.0 Hz, 1H), 7.24 (d, J = 3.7 Hz, 1H), 4.85 (d, J = 4.3 Hz, 2H), 4.05 (s, 3H), 2.61 (s, 3H). LCMS (ESI): m/z 568.1 [M+ H]<sup>+</sup>, Rt: 5.21 min. **IBL-202:** Compound **17** (306 mg, 0.298 mmol theoretic) was dissolved in DMF (12.38 ml) and DIPEA (0.40 ml, 2.251 mmol). The mixture was slowly added (syringe pump; 2 mL/h) to a solution of HATU (232 mg, 0.597 mmol) and HOAt (0.5 M in DMF, 1.19 ml, 0.597 mmol) in DMF (47.32 ml). After addition, the reaction was stirred for 10 hours, then evaporated and the resulting crude was purified by Biotage Flash Chromatography (silica gel) using Cyclohexane-EtOAc gradient from 0% - 100% to give expected product which was triturated with MeOH and CH<sub>3</sub>CN to yield pure compound **IBL-202** (51 mg, 0.093 mmol). <sup>1</sup>H NMR (300 MHz, DMSO) δ 10.70 (s, 1H), 9.84

(t, J = 6.0 Hz, 1H), 8.71 (d, J = 5.0 Hz, 1H), 8.60 (s, 1H), 8.32 (d, J = 2.1 Hz, 1H), 8.28 (d, J = 8.8 Hz, 1H), 8.16 (d, J = 7.8 Hz, 1H), 7.84 (t, J = 7.8 Hz, 1H), 7.73 (d, J = 4.9 Hz, 1H), 7.67 (d, J = 3.6 Hz, 1H), 7.60 (d, J = 2.1 Hz, 1H), 7.20 (d, J = 3.6 Hz, 1H), 4.78 (d, J = 5.5 Hz, 2H), 4.04 (s, 3H), 2.62 (s, 3H). LCMS (ESI): m/z 549.1 [M+ H]<sup>+</sup>, Rt: 4.80 min.

### *Mass spectrometry*

#### Cell samples and protein extraction

Cells, 5 million, were lysed with 4 M urea in 100 mM ammonium bicarbonate (AMBIC) and mixed using a Vortex mixer then the samples were placed on ice for 15 min. The samples were mixed again and were placed on ice for another 15 min. The samples were placed in a Bioruptor® Plus (Diagenode) and the settings were: 50 cycles of 15 sec on and 15 sec off. The samples were centrifuged 10 000 x g for 10 min at 4 °C. The supernatants were collected and protein determination was done by MicroBCA™ Protein Assay Kit (Thermo Scientific) according to the manufacturer instructions.

#### In-solution digestion with Lys C and trypsin

Samples were diluted with 4 M urea in 100 mM AMBIC to a concentration of 2.5 µg/µL in a final volume of 40 µL. The digestion was performed using a Bravo robot (Agilent Technologies). Reduction was performed by adding 10 µL 70 mM dithiothreitol and incubated for 1 h at 37 °C followed by alkylation using 20 µL 70 mM iodoacetamide for 30 min at room temperature. Digestion was started by adding 90 µL 0.022 µg/µL LysC (Mass Spec Grade, Cat # VA1170, Promega). After 5 hrs at room temperature 108 µL 0.0185 µg/µL trypsin (Sequence Grade Modified #V511, Promega) was added and incubated 16 hrs at room temperature. The digestion was stopped by adding 12 µL 10% trifluoroacetic acid (TFA). Total sample volume 280 µL.

#### Peptide clean-up

Peptide clean-up was performed using the Bravo robot. AssayMAP cartridge Reverse Phase S (Cat # G5496-60033, Agilent Technologies) was used for the clean up to remove salts. The C18 cartridge was primed with 100 µL 0.1% TFA, 50% acetonitrile (ACN) in water followed by equilibration with 70 µL 0.1% TFA in water. The samples, 280 µL were loaded to the cartridge and washed with 50 µL 0.1% TFA in water three times. The peptides were eluted with 35 µL 80% ACN, 0.1% TFA in water. For the global analysis the samples were dried using a Speed Vac and resolved in 2% ACN, 0.1% TFA in water.

### Phosphopeptides enrichment

Enrichment of phosphopeptides was performed using the Bravo robot. Before the enrichment the peptides had to be clean-up by the C18 cartridges, but were used directly without drying. For the enrichment of phosphopeptides AssayMAP cartridge Fe(III)-NTA (Cat # G5496-60085, Agilent Technologies) was used. The cartridge was primed with 100  $\mu$ L 50% ACN, 0.1% TFA in water followed by equilibration with 50  $\mu$ L 80%, 0.1% TFA in water. The samples, 280  $\mu$ L were loaded to the cartridge and washed with 50  $\mu$ L 80%, 0.1% TFA in water three times. The peptides were eluted with 25  $\mu$ L 5% ammonium hydroxide and acidified with 10  $\mu$ L 50% formic acid. The samples were dried using a Speed Vac and resolved in 2% CAN, 0.1% TFA in water.

### Peptide determination

For the global analysis a peptide determination was performed before injection into the liquid chromatography mass spectrometer (LC-MS) using Pierce<sup>TM</sup>Quantitative Colorimetric Peptide assay (Thermo Scientific) according to the manufacturer instructions.

### Mass spectrometry acquisition

The LC-MS detection was performed on Tribrid mass spectrometer Fusion equipped with a Nanospray Flex ion source and coupled with an EASY-nLC 1000 ultrahigh pressure liquid chromatography (UHPLC) pump (Thermo Fischer Scientific). For the global analysis, 1  $\mu$ g of the peptides was injected and for the phosphopeptide analysis the whole sample was injected into the LC-MS. Peptides were concentrated on an Acclaim PepMap 100 C18 precolumn (75  $\mu$ m x 2 cm, Thermo Scientific, Waltham, MA) and then separated on an Acclaim PepMap RSLC column (75  $\mu$ m x 25 cm, nanoViper, C18, 2  $\mu$ m, 100 Å) at the temperature of 40 °C and with a flow rate of 300 nL/min. Solvent A (0.1% formic acid in water) and solvent B (0.1% formic acid in acetonitrile) were used to create a nonlinear gradient to elute the peptides. For the gradient, the percentage of solvent B was maintained at 3% for 3 min, increased from 3% to 30% for 90 min and then increased to 60% for 15 min and then increased to 90% for 5 min and then kept at 90% for another 7 min to wash the column.

The Orbitrap Fusion was operated in the positive data-dependent acquisition (DDA) mode. The peptides were introduced into the LC-MS via stainless steel Nano-bore emitter (OD 150  $\mu$ m, ID 30  $\mu$ m) with the spray voltage of 2 kV and the capillary temperature was set 275 °C. Full

MS survey scans from m/z 350-1350 with a resolution of 120,000 were performed in the Orbitrap detector. The automatic gain control (AGC) target was set to  $4 \times 10^5$  with an injection time of 50 ms. The most intense ions (up to 20) with charge states 2-5 from the full scan MS were selected for fragmentation in the Orbitrap. The MS2 precursors were isolated with a quadrupole mass filter set to a width of 1.2 m/z. Precursors were fragmented by high-energy collision dissociation (HCD) at a normalized collision energy (NCE) of 30%. The resolution was fixed at 30000 and for the MS/MS scans, the values for the AGC target and injection time were  $5 \times 10^4$  and 54 ms, respectively. The duration of dynamic exclusion was set to 45s and the mass tolerance window was 10 ppm.

### Data analysis

The raw DDA data were analyzed with Proteome Discoverer™ 2.2 (PD 2.2) Software (Thermo Fisher Scientific). Peptides were identified using SEQUEST HT against UniProtKB human database (release 20171218). The search was performed with the following parameters applied: static modification: cysteine carbamidomethylation and dynamic modifications: N-terminal acetylation, methionine oxidation and phosphorylation. Precursor tolerance was set to 10 ppm and fragment tolerance was set to 0.05 ppm. Up to 2 missed cleavages were allowed and Percolator was used for peptide validation at a q-value of maximum 0.01. Filter settings at the protein level: Master is equal to Master, Protein Unique Peptides is greater than or equal to 2, Found in Files has confidence High in at least 2 files. Filter settings peptide level: Found in Samples has confidence High in at least 2 samples. Extracted peptides were used to identify and quantify them by label-free relative quantification. The extracted chromatographic areas were used to compare peptide abundance across samples.

### Chemicals

Ammonium bicarbonate (A6141), urea (U1250), dithiothreitol (D0632), iodoacetamide (I-1149), trifluoroacetic acid (T6399) were purchased from Sigma-Aldrich. Acetonitrile (1.00029) and Water (1.15333) were purchased from LiChrosolv. Formic acid (A117-50) was purchased from Fisher Chemical. Ammonium hydroxide (3388-18) was purchased from Honeywell.

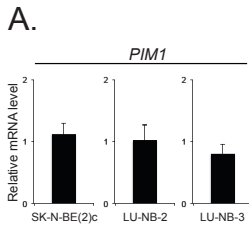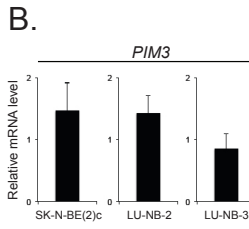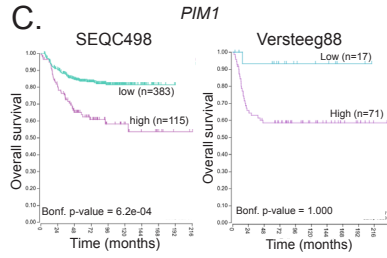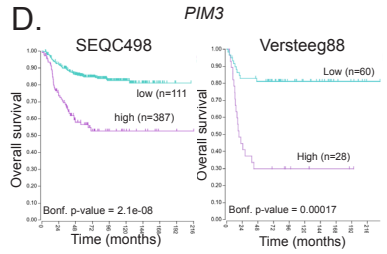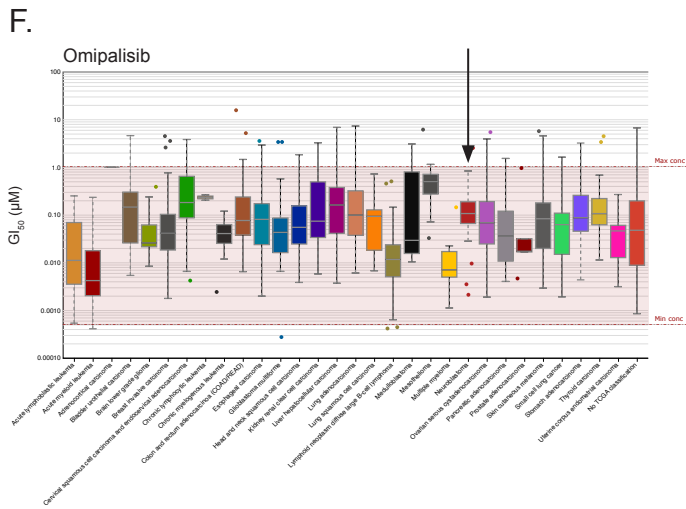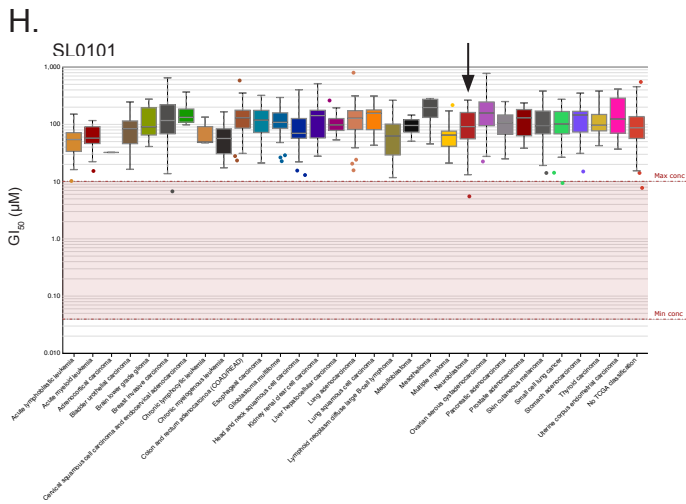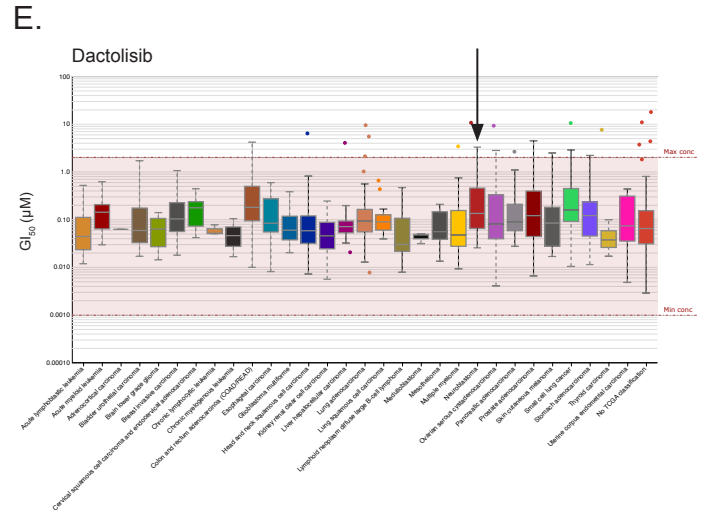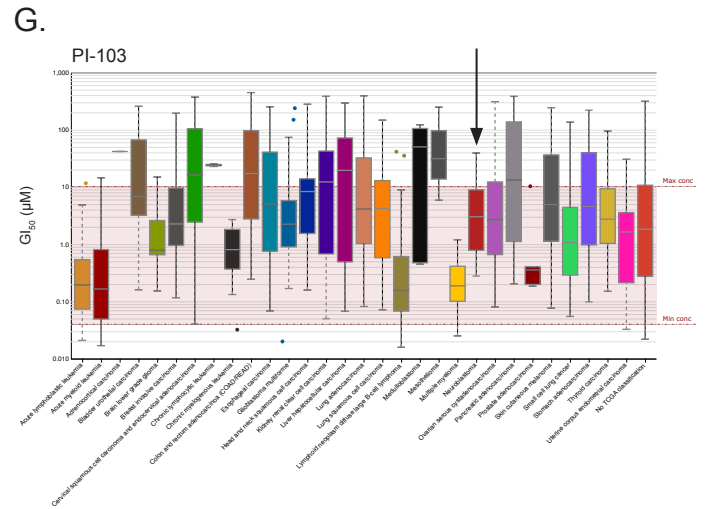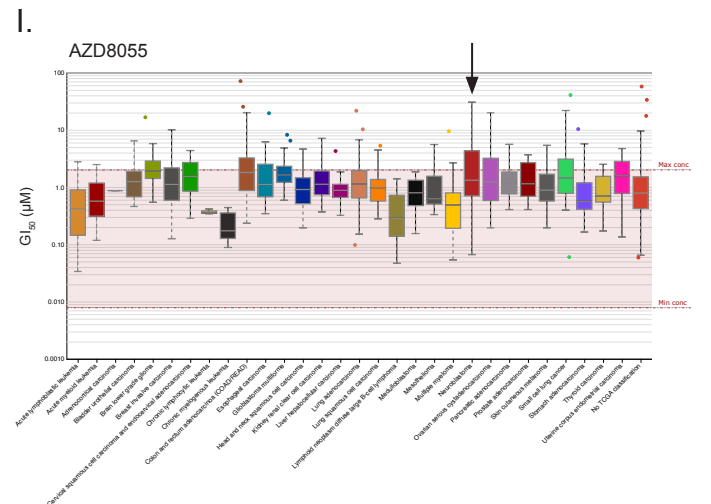

**A.**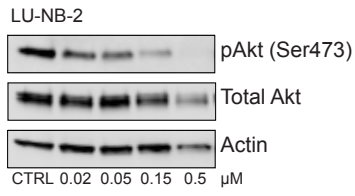**B.**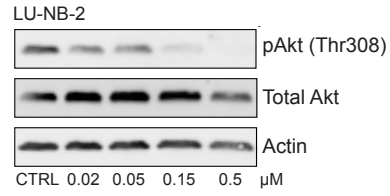**C.**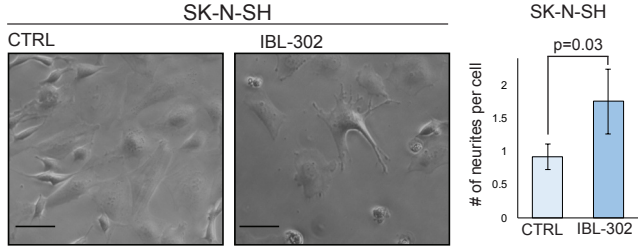**D.**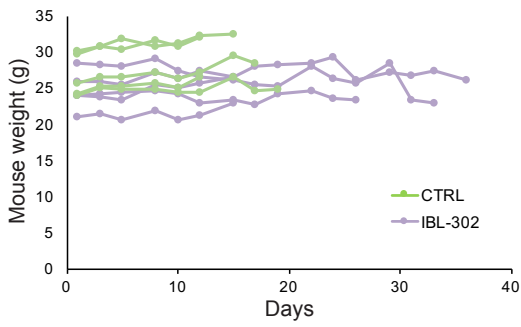**E.**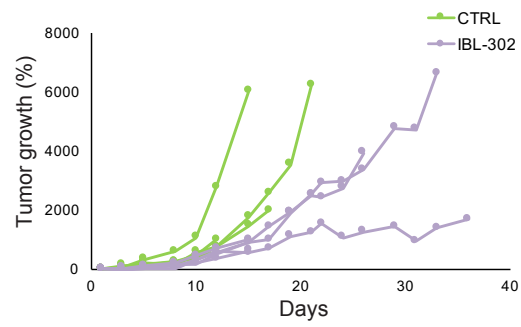

A.

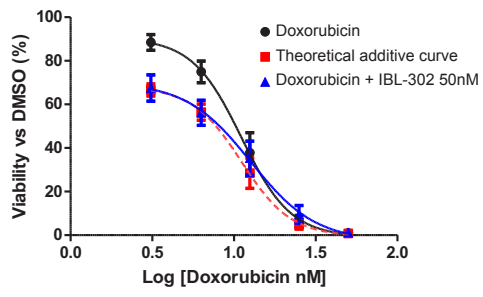

B.

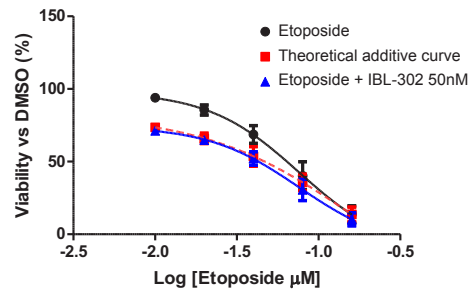

C.

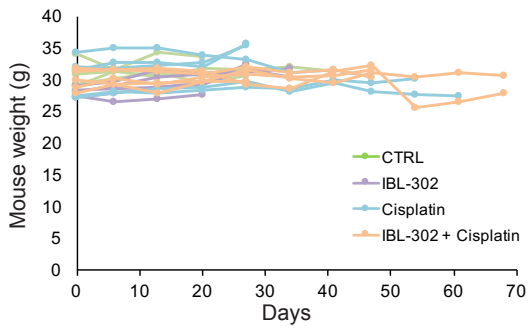



| <b>Cells</b> | <b>Patient age</b> | <b>Sample type</b> | <b>Chemotherapy</b> | <b>Stage</b> | <b>Histology</b> | <b>SNP profile</b>  |
|--------------|--------------------|--------------------|---------------------|--------------|------------------|---------------------|
| LU-NB-2      | 2y2m               | Metastasis         | Yes                 | IV           | UD               | MYCN amp, 1p-, +17q |
| LU-NB-3      | 2y9m               | Primary (AG)       | No                  | III          | PD               | MYCN amp, 1p-, +17q |

| <b>Inhibitor</b> | <b>Target</b> | <b>GI<sub>50</sub> range</b> |
|------------------|---------------|------------------------------|
| IBL-202          | PIM/PI3K      | 0.1-1.5 $\mu$ M              |
| IBL-301          | PIM/PI3K/mTOR | 0.05-0.85 $\mu$ M            |
| IBL-302          | PIM/PI3K/mTOR | 0.05-0.85 $\mu$ M            |

| <b>Target gene</b>            | <b>5' - 3'</b> |                          |
|-------------------------------|----------------|--------------------------|
| <i>UBC (Reference gene)</i>   | Fwd            | ATTTGGGTCGCGGTTCTTG      |
|                               | Rev            | TGCCTTGACATTCTCGATGGT    |
|                               |                |                          |
| <i>SDHA (Reference gene)</i>  | Fwd            | TGGGAACAAGAGGGCATCTG     |
|                               | Rev            | CCACCACTGCATCAAATTCATG   |
|                               |                |                          |
| <i>YWHAZ (Reference gene)</i> | Fwd            | ACTTTTGGTACATTGTGGCTTCAA |
|                               | Rev            | CCGCCAGGACAAACCAGTAT     |
|                               |                |                          |
| <i>PIM1</i>                   | Fwd            | TTGGTTCCTTCCTATTCCA      |
|                               | Rev            | CACCCACAAACAGAGCA        |
|                               |                |                          |
| <i>PIM3</i>                   | Fwd            | CGATGCTGCTCTCCAAGTTC     |
|                               | Rev            | TCTCGAAGCTCTCCTTGTC      |
|                               |                |                          |
| <i>GAP43</i>                  | Fwd            | ACGACCAAAGATTGAACAAGATG  |
|                               | Rev            | TCCACGGAAGCTAGCCTGAA     |
|                               |                |                          |
| <i>MYCN</i>                   | Fwd            | CGCAAAGCCACCTCTCATTA     |
|                               | Rev            | TCCAGCAGATGCCACATAAGG    |

| <b>Western Blot antibodies</b> |                |                 |                    |                  |
|--------------------------------|----------------|-----------------|--------------------|------------------|
| <b>Primary Antibody</b>        | <b>Species</b> | <b>Dilution</b> | <b>Source</b>      | <b>Product #</b> |
| Phospho-Akt (Ser-473)          | Rabbit         | 1:2000          | Cell Signaling     | 4060             |
| Phospho-Akt (Thr-308)          | Rabbit         | 1:1000          | Cell Signaling     | 2965             |
| Total Akt                      | Mouse          | 1:2000          | Cell Signaling     | 2920             |
| Cleaved Caspase3               | Rabbit         | 1:1000          | Cell signaling     | 9662             |
| Gap43                          | Rabbit         | 1:1000          | Cell signaling     | 8945             |
| N-Myc                          | Rabbit         | 1:5000          | Novus              | 23960002         |
| N-Myc                          | Rabbit         | 1:500           | Santa cruz Biotech | Sc-791           |
| Phospho-p70 S6 Kinase (Thr389) | Rabbit         | 1:1000          | Cell signaling     | 9205             |
| p70 S6 Kinase                  | Rabbit         | 1:1000          | Cell Signaling     | 9202             |
| Phospho-PRAS40 (T246)          | Rabbit         | 1:1000          | Abcam              | Ab134084         |
| PRAS40                         | Rabbit         | 1:2000          | Abcam              | Ab134158         |
| Actin                          | Mouse          | 1:2000          | MP biomedicals     | 691001           |
| SDHA                           | Mouse          | 1:4000          | Abcam              | Ab14715          |
| <b>Secondary Antibody</b>      |                |                 |                    |                  |
| <b>Secondary Antibody</b>      | <b>Species</b> | <b>Dilution</b> | <b>Source</b>      |                  |
| Anti-Mouse                     | Sheep          | 1:5000          | Invitrogen         | 62-6520          |
| Anti-Rabbit                    | Goat           | 1:5000          | Invitrogen         | 65-6120          |

| <b>Immunohistochemistry antibodies</b> |                |                 |               |                  |
|----------------------------------------|----------------|-----------------|---------------|------------------|
| <b>Primary Antibody</b>                | <b>Species</b> | <b>Dilution</b> | <b>Source</b> | <b>Product #</b> |
| N-Myc                                  | Rabbit         | 1:300           | Novus         | 23960002         |

| <b>Immunofluorescence antibodies</b> |                |                 |               |                  |
|--------------------------------------|----------------|-----------------|---------------|------------------|
| <b>Primary Antibody</b>              | <b>Species</b> | <b>Dilution</b> | <b>Source</b> | <b>Product #</b> |
| Tuj1                                 | Mouse          | 1:500           | Covance       | MMS-435P         |
| <b>Secondary Antibody</b>            |                |                 |               |                  |
| <b>Secondary Antibody</b>            | <b>Species</b> | <b>Dilution</b> | <b>Source</b> |                  |
| Alexa Fluor 488 goat anti-mouse      | Goat           | 1:200           | Invitrogen    | A11029           |

## Screening IBL-302 across a panel of 707 cell lines from 47 tumor types

| <b>COSMIC</b> | <b>Cell_line</b> | <b>tissue</b> | <b>tissue2</b>                 | <b>IBL-302</b> | <b>IBL-302 IC50</b> |
|---------------|------------------|---------------|--------------------------------|----------------|---------------------|
| 906870        | GDM-1            | leukemia      | acute_myeloid_leukaemia        | -4,984151604   | 0,006845583         |
| 908451        | NOMO-1           | leukemia      | acute_myeloid_leukaemia        | -2,500154167   | 0,082072345         |
| 909253        | P31-FUJ          | leukemia      | acute_myeloid_leukaemia        | -2,490408127   | 0,082876136         |
| 907280        | KMOE-2           | leukemia      | acute_myeloid_leukaemia        | -2,266013077   | 0,1037249           |
| 908448        | NKM-1            | leukemia      | acute_myeloid_leukaemia        | -2,218806153   | 0,108738849         |
| 910947        | OCI-AML2         | leukemia      | acute_myeloid_leukaemia        | -2,082427444   | 0,124627319         |
| 908148        | MONO-MAC-6       | leukemia      | acute_myeloid_leukaemia        | -1,69795672    | 0,183057179         |
| 908141        | ML-2             | leukemia      | acute_myeloid_leukaemia        | -1,402887276   | 0,245885997         |
| 1330947       | MOLM-13          | leukemia      | acute_myeloid_leukaemia        | -1,396622607   | 0,247431227         |
| 905938        | HL-60            | leukemia      | acute_myeloid_leukaemia        | -1,339603526   | 0,261949504         |
| 1290455       | OCI-AML3         | leukemia      | acute_myeloid_leukaemia        | -1,146771188   | 0,317660782         |
| 1330985       | OCI-M1           | leukemia      | acute_myeloid_leukaemia        | -1,108889815   | 0,329925036         |
| 907278        | KG-1             | leukemia      | acute_myeloid_leukaemia        | -0,955638274   | 0,384566607         |
| 1330942       | ME-1             | leukemia      | acute_myeloid_leukaemia        | -0,397740422   | 0,671836399         |
| 753548        | CTV-1            | leukemia      | acute_myeloid_leukaemia        | 0,993475633    | 2,70060449          |
| 909744        | SW13             | kidney        | adrenal_gland                  | -1,691715097   | 0,184203326         |
| 907273        | KARPAS-299       | lymphoma      | anaplastic_large_cell_lymphoma | -1,994687458   | 0,136056171         |
| 909777        | U-698-M          | leukemia      | B_cell_leukemia                | -2,792230898   | 0,061284342         |
| 908158        | NALM-6           | leukemia      | B_cell_leukemia                | -2,773235761   | 0,062459573         |
| 909696        | REH              | leukemia      | B_cell_leukemia                | -1,377373617   | 0,252240163         |
| 910705        | BALL-1           | leukemia      | B_cell_leukemia                | -1,022238562   | 0,359788629         |
| 1327774       | KARPAS-231       | leukemia      | B_cell_leukemia                | -0,706874336   | 0,493183316         |
| 908132        | MHH-CALL-2       | leukemia      | B_cell_leukemia                | -0,442804623   | 0,642232672         |
| 908136        | MHH-PREB-1       | leukemia      | B_cell_leukemia                | -0,039971477   | 0,960816844         |
| 908143        | MN-60            | leukemia      | B_cell_leukemia                | 0,133610173    | 1,142947181         |
| 1330933       | KOPN-8           | leukemia      | B_cell_leukemia                | 0,139456899    | 1,149649254         |
| 1331037       | SU-DHL-6         | lymphoma      | B_cell_lymphoma                | -5,171696642   | 0,005674932         |
| 1327773       | KARPAS-1106P     | lymphoma      | B_cell_lymphoma                | -3,626090001   | 0,026620066         |

|         |            |                        |                 |              |             |
|---------|------------|------------------------|-----------------|--------------|-------------|
| 1331033 | SU-DHL-10  | lymphoma               | B_cell_lymphoma | -2,966485572 | 0,051483929 |
| 909773  | TUR        | lymphoma               | B_cell_lymphoma | -2,924337276 | 0,053700269 |
| 1331050 | WSU-DLCL2  | lymphoma               | B_cell_lymphoma | -2,636891234 | 0,07158346  |
| 910934  | A4-Fuk     | lymphoma               | B_cell_lymphoma | -2,428960606 | 0,088128385 |
| 907274  | KARPAS-422 | lymphoma               | B_cell_lymphoma | -2,176013245 | 0,113493099 |
| 1331032 | SLVL       | lymphoma               | B_cell_lymphoma | -1,829990372 | 0,160415112 |
| 910935  | A3-KAW     | lymphoma               | B_cell_lymphoma | -1,770548173 | 0,170239642 |
| 1331048 | VAL        | lymphoma               | B_cell_lymphoma | -1,726326114 | 0,177936931 |
| 906832  | DB         | lymphoma               | B_cell_lymphoma | -1,657533744 | 0,19060849  |
| 910919  | BC-1       | lymphoma               | B_cell_lymphoma | -1,346037357 | 0,260269575 |
| 1331038 | SU-DHL-8   | lymphoma               | B_cell_lymphoma | -1,271970063 | 0,28027891  |
| 1331036 | SU-DHL-5   | lymphoma               | B_cell_lymphoma | -1,10632356  | 0,330772795 |
| 910930  | SCC-3      | lymphoma               | B_cell_lymphoma | -0,859994795 | 0,423164285 |
| 1330995 | RC-K8      | lymphoma               | B_cell_lymphoma | -0,64946062  | 0,522327434 |
| 1331045 | TK         | lymphoma               | B_cell_lymphoma | 0,314592415  | 1,369700928 |
| 1327769 | JSC-1      | lymphoma               | B_cell_lymphoma | 1,074299756  | 2,927941909 |
| 906853  | EGI-1      | digestive_system       | biliary_tract   | -2,036426135 | 0,130494247 |
| 906861  | ETK-1      | digestive_system       | biliary_tract   | -1,03915508  | 0,353753449 |
| 909769  | TGBC1TKB   | digestive_system       | biliary_tract   | -0,590139742 | 0,554249827 |
| 907069  | HuCCT1     | digestive_system       | biliary_tract   | -0,216311742 | 0,805484159 |
| 910695  | TGBC24TKB  | digestive_system       | biliary_tract   | -0,182760871 | 0,832967319 |
| 1290730 | CAL-29     | urogenital_system      | Bladder         | -2,875572496 | 0,056383851 |
| 910926  | BFTC-905   | urogenital_system      | Bladder         | -2,794820036 | 0,061125874 |
| 753584  | LB831-BLC  | urogenital_system      | Bladder         | -1,965747217 | 0,140051199 |
| 909749  | SW1710     | urogenital_system      | Bladder         | -1,83767879  | 0,159186503 |
| 687459  | TCCSUP     | urogenital_system      | Bladder         | -1,480208397 | 0,227590254 |
| 909704  | RT-112     | urogenital_system      | Bladder         | -1,095035301 | 0,334527798 |
| 909780  | VM-CUB-1   | urogenital_system      | Bladder         | -0,844960533 | 0,429574312 |
| 687452  |            | 5637 urogenital_system | Bladder         | -0,771800509 | 0,462180159 |
| 724838  | UM-UC-3    | urogenital_system      | Bladder         | -0,722548921 | 0,485513143 |
| 906797  | 647-V      | urogenital_system      | Bladder         | -0,616436323 | 0,539864918 |
| 753552  | DSH1       | urogenital_system      | Bladder         | -0,615666356 | 0,540280756 |

|                   |                   |            |              |             |
|-------------------|-------------------|------------|--------------|-------------|
| 687455 RT4        | urogenital_system | Bladder    | -0,552859466 | 0,575302398 |
| 907312 KU-19-19   | urogenital_system | Bladder    | -0,533872846 | 0,586329802 |
| 753566 J82        | urogenital_system | Bladder    | -0,39375667  | 0,674518167 |
| 906798 639-V      | urogenital_system | Bladder    | 0,710741162  | 2,035499334 |
| 907066 HT-1376    | urogenital_system | Bladder    | 0,964256009  | 2,622835564 |
| 687457 SW780      | urogenital_system | Bladder    | 3,942467305  | 51,54562331 |
| 1290795 CS1       | bone              | bone_other | -1,612698776 | 0,199348889 |
| 909717 SJSA-1     | bone              | bone_other | -0,451309048 | 0,636794012 |
| 908121 MDA-MB-361 | breast            | breast     | -3,309376043 | 0,036538965 |
| 905957 Hs-578-T   | breast            | breast     | -3,098030213 | 0,045138027 |
| 749711 HCC1187    | breast            | breast     | -3,008511591 | 0,0493651   |
| 908122 MDA-MB-453 | breast            | breast     | -2,783083337 | 0,061847516 |
| 905945 T47D       | breast            | breast     | -2,729364083 | 0,065260777 |
| 906851 EFM-19     | breast            | breast     | -2,663747694 | 0,069686568 |
| 908151 MRK-nu-1   | breast            | breast     | -2,588185936 | 0,075156255 |
| 907048 HCC70      | breast            | breast     | -2,541027545 | 0,078785403 |
| 906812 COLO-824   | breast            | breast     | -2,343710274 | 0,095970899 |
| 906844 DU-4475    | breast            | breast     | -2,244921029 | 0,105935906 |
| 946359 BT-474     | breast            | breast     | -2,207988648 | 0,109921517 |
| 749715 HCC2157    | breast            | breast     | -2,143666417 | 0,117224261 |
| 908123 MDA-MB-468 | breast            | breast     | -2,010458423 | 0,133927265 |
| 906801 BT-20      | breast            | breast     | -1,983277044 | 0,137617519 |
| 910852 CAL-85-1   | breast            | breast     | -1,908354061 | 0,148324319 |
| 1290922 HDQ-P1    | breast            | breast     | -1,873720396 | 0,153551326 |
| 946382 CAMA-1     | breast            | breast     | -1,863567074 | 0,155118324 |
| 909256 OCUB-M     | breast            | breast     | -1,851707531 | 0,156968908 |
| 907047 HCC1806    | breast            | breast     | -1,768366862 | 0,170611393 |
| 924106 CAL-148    | breast            | breast     | -1,206738719 | 0,299171372 |
| 749709 HCC1954    | breast            | breast     | -0,971469619 | 0,37852634  |
| 905960 MDA-MB-231 | breast            | breast     | -0,883958127 | 0,413144393 |
| 749710 HCC1143    | breast            | breast     | -0,840758262 | 0,431383298 |
| 905951 BT-549     | breast            | breast     | -0,790107598 | 0,453795965 |

|         |                |          |                  |              |             |
|---------|----------------|----------|------------------|--------------|-------------|
| 924240  | MDA-MB-415     | breast   | breast           | -0,75586532  | 0,469604081 |
| 749717  | HCC38          | breast   | breast           | -0,752456925 | 0,471207408 |
| 910948  | MFM-223        | breast   | breast           | -0,732271242 | 0,4808157   |
| 906862  | EVSA-T         | breast   | breast           | -0,658519404 | 0,517617149 |
| 910927  | CAL-51         | breast   | breast           | -0,655091331 | 0,519394624 |
| 906826  | CAL-120        | breast   | breast           | -0,607714389 | 0,544594178 |
| 910910  | UACC-812       | breast   | breast           | -0,421052755 | 0,656355474 |
| 1290798 | EFM-192A       | breast   | breast           | -0,206793764 | 0,813187341 |
| 749712  | HCC1395        | breast   | breast           | 0,065949829  | 1,068173125 |
| 925338  | MDA-MB-157     | breast   | breast           | 0,143488708  | 1,154293776 |
| 905946  | MCF7           | breast   | breast           | 0,158391722  | 1,171625056 |
| 910704  | AU565          | breast   | breast           | 0,195867596  | 1,216365843 |
| 1290905 | HCC1428        | breast   | breast           | 0,208793542  | 1,232190577 |
| 1303900 | HCC1500        | breast   | breast           | 0,643630908  | 1,903379343 |
| 907045  | HCC1419        | breast   | breast           | 0,685565544  | 1,984894063 |
| 749714  | HCC1937        | breast   | breast           | 0,851244355  | 2,342560015 |
| 949093  | BT-483         | breast   | breast           | 0,977049605  | 2,656606629 |
| 909907  | ZR-75-30       | breast   | breast           | 2,234775602  | 9,344384756 |
| 1240172 | MDA-MB-436     | breast   | breast           | 2,389917159  | 10,9125899  |
| 908159  | NAMALWA        | lymphoma | Burkitt_lymphoma | -2,927056443 | 0,053554447 |
| 910706  | BL-41          | lymphoma | Burkitt_lymphoma | -2,704195246 | 0,06692416  |
| 910401  | Ramos-2G6-4C10 | lymphoma | Burkitt_lymphoma | -2,513007083 | 0,081024226 |
| 906838  | DG-75          | lymphoma | Burkitt_lymphoma | -1,874788656 | 0,153387381 |
| 906831  | Daudi          | lymphoma | Burkitt_lymphoma | -1,873800861 | 0,153538971 |
| 906847  | EB-3           | lymphoma | Burkitt_lymphoma | -1,592020404 | 0,203514016 |
| 910906  | ST486          | lymphoma | Burkitt_lymphoma | -1,402982537 | 0,245862575 |
| 1303896 | GA-10          | lymphoma | Burkitt_lymphoma | -1,391073161 | 0,24880815  |
| 906846  | EB2            | lymphoma | Burkitt_lymphoma | -0,298464792 | 0,741956404 |
| 1330987 | P32-ISH        | lymphoma | Burkitt_lymphoma | -0,274862569 | 0,759676519 |
| 910703  | CA46           | lymphoma | Burkitt_lymphoma | 0,046476964  | 1,047573947 |
| 909262  | Raji           | lymphoma | Burkitt_lymphoma | 0,390422926  | 1,47760558  |
| 907268  | JiyoyeP-2003   | lymphoma | Burkitt_lymphoma | 0,581679476  | 1,78904056  |



|         |            |                   |                           |              |             |
|---------|------------|-------------------|---------------------------|--------------|-------------|
| 924107  | CAL-39     | urogenital_system | cervix                    | -3,6449468   | 0,0261228   |
| 906843  | DoTc2-4510 | urogenital_system | cervix                    | -2,873685933 | 0,056490323 |
| 906824  | Ca-Ski     | urogenital_system | cervix                    | -2,622870587 | 0,072594176 |
| 687514  | ME-180     | urogenital_system | cervix                    | -1,359073238 | 0,256898751 |
| 946357  | TC-YIK     | urogenital_system | cervix                    | -1,252072978 | 0,285911494 |
| 907068  | HT-3       | urogenital_system | cervix                    | -0,716005316 | 0,488700566 |
| 1240212 | SISO       | urogenital_system | cervix                    | -0,603719967 | 0,546773867 |
| 930297  | SiHa       | urogenital_system | cervix                    | 0,332681037  | 1,394702369 |
| 930298  | SKG-IIIa   | urogenital_system | cervix                    | 0,725130429  | 2,065000418 |
| 1240179 | MS751      | urogenital_system | cervix                    | 0,751125427  | 2,119383887 |
| 687505  | C-33-A     | urogenital_system | cervix                    | 0,896310787  | 2,450545829 |
| 724839  | SW756      | urogenital_system | cervix                    | 3,308827588  | 27,35303764 |
| 907290  | H-EMC-SS   | bone              | chondrosarcoma            | -3,06844278  | 0,046493499 |
| 1303912 | CHSA8926   | bone              | chondrosarcoma            | -2,4938963   | 0,082587553 |
| 906855  | EM-2       | leukemia          | chronic_myeloid_leukaemia | -2,422110503 | 0,088734146 |
| 1330931 | KCL-22     | leukemia          | chronic_myeloid_leukaemia | -1,98912582  | 0,136814974 |
| 910710  | BV-173     | leukemia          | chronic_myeloid_leukaemia | -1,610153036 | 0,199857026 |
| 910544  | RPMI-8866  | leukemia          | chronic_myeloid_leukaemia | -1,390784971 | 0,248879864 |
| 910951  | CML-T1     | leukemia          | chronic_myeloid_leukaemia | -1,330601261 | 0,264318289 |
| 908126  | MEG-01     | leukemia          | chronic_myeloid_leukaemia | -1,046649796 | 0,351112078 |
| 905940  | K-562      | leukemia          | chronic_myeloid_leukaemia | -0,476385815 | 0,621023836 |
| 907311  | KU812      | leukemia          | chronic_myeloid_leukaemia | 0,075296191  | 1,078203458 |
| 907783  | LAMA-84    | leukemia          | chronic_myeloid_leukaemia | 0,211652319  | 1,235718175 |
| 1327771 | JURL-MK1   | leukemia          | chronic_myeloid_leukaemia | 0,258440478  | 1,294909072 |
| 908129  | MFE-280    | urogenital_system | endometrium               | -3,519509654 | 0,029613953 |
| 909735  | SNG-M      | urogenital_system | endometrium               | -2,482968673 | 0,083494988 |
| 910781  | AN3-CA     | urogenital_system | endometrium               | -2,468148551 | 0,084741609 |
| 924187  | KLE        | urogenital_system | endometrium               | -1,367389599 | 0,254771147 |
| 1240174 | MFE-319    | urogenital_system | endometrium               | -0,55284126  | 0,575312873 |
| 907051  | HEC-1      | urogenital_system | endometrium               | -0,514487917 | 0,597806643 |
| 910691  | COLO-684   | urogenital_system | endometrium               | -0,188195005 | 0,828453139 |
| 930082  | RL95-2     | urogenital_system | endometrium               | -0,030194937 | 0,970256376 |

|                  |                   |                |              |             |
|------------------|-------------------|----------------|--------------|-------------|
| 1240127 EN       | urogenital_system | endometrium    | 0,449524853  | 1,567567184 |
| 908130 MFE-296   | urogenital_system | endometrium    | 0,61424954   | 1,848269027 |
| 949164 EW-18     | bone              | ewings_sarcoma | -3,108461746 | 0,044669616 |
| 949167 EW-22     | bone              | ewings_sarcoma | -2,574482462 | 0,076193245 |
| 949160 EW-7      | bone              | ewings_sarcoma | -2,145531782 | 0,117005799 |
| 949156 ES4       | bone              | ewings_sarcoma | -2,120245545 | 0,120002159 |
| 684059 ES7       | bone              | ewings_sarcoma | -2,03609875  | 0,130536976 |
| 1240221 TC-71    | bone              | ewings_sarcoma | -2,013080748 | 0,133576525 |
| 949158 ES1       | bone              | ewings_sarcoma | -1,97573217  | 0,138659753 |
| 909731 SK-PN-DW  | bone              | ewings_sarcoma | -1,78918097  | 0,167096971 |
| 949155 ES8       | bone              | ewings_sarcoma | -1,771933604 | 0,17000395  |
| 949163 EW-1      | bone              | ewings_sarcoma | -1,770743713 | 0,170206357 |
| 949161 EW-3      | bone              | ewings_sarcoma | -1,759405955 | 0,172147097 |
| 949168 EW-24     | bone              | ewings_sarcoma | -1,435831143 | 0,237917538 |
| 684062 EW-11     | bone              | ewings_sarcoma | -1,218083143 | 0,295796624 |
| 684072 SK-ES-1   | bone              | ewings_sarcoma | -0,736023577 | 0,479014899 |
| 949165 EW-16     | bone              | ewings_sarcoma | -0,658527381 | 0,51761302  |
| 949157 ES6       | bone              | ewings_sarcoma | -0,112649821 | 0,893463477 |
| 949166 EW-13     | bone              | ewings_sarcoma | 2,417454664  | 11,21727122 |
| 909754 SW684     | soft_tissue       | fibrosarcoma   | -0,340127675 | 0,711679453 |
| 907064 HT-1080   | soft_tissue       | fibrosarcoma   | -0,229803223 | 0,794689964 |
| 909905 YH-13     | nervous_system    | glioma         | -3,629187493 | 0,026537738 |
| 907042 H4        | nervous_system    | glioma         | -3,525109601 | 0,02944858  |
| 906871 GI-1      | nervous_system    | glioma         | -3,519866511 | 0,029603387 |
| 687586 T98G      | nervous_system    | glioma         | -3,329261201 | 0,035819559 |
| 906868 GAMG      | nervous_system    | glioma         | -2,540306797 | 0,078842208 |
| 909750 SW1783    | nervous_system    | glioma         | -2,40177311  | 0,090557243 |
| 910694 LN-405    | nervous_system    | glioma         | -2,334132073 | 0,096894543 |
| 907313 KS-1      | nervous_system    | glioma         | -2,134167788 | 0,118343036 |
| 908144 MOG-G-CCM | nervous_system    | glioma         | -1,955806954 | 0,141450287 |
| 906746 Becker    | nervous_system    | glioma         | -1,953340495 | 0,141799599 |
| 909745 SW1088    | nervous_system    | glioma         | -1,803859556 | 0,164662137 |

|                    |                |                               |              |             |
|--------------------|----------------|-------------------------------|--------------|-------------|
| 949094 M059J       | nervous_system | glioma                        | -1,79215436  | 0,166600865 |
| 1240168 LN-18      | nervous_system | glioma                        | -1,730353881 | 0,177221683 |
| 910943 CAS-1       | nervous_system | glioma                        | -1,685773984 | 0,185300956 |
| 908145 MOG-G-UVW   | nervous_system | glioma                        | -1,659792927 | 0,190178357 |
| 946368 D-263MG     | nervous_system | glioma                        | -1,641407609 | 0,193707186 |
| 946370 D-392MG     | nervous_system | glioma                        | -1,475830131 | 0,22858889  |
| 1240170 LNZTA3WT4  | nervous_system | glioma                        | -1,321440245 | 0,266750839 |
| 905984 SF539       | nervous_system | glioma                        | -1,223179836 | 0,294292874 |
| 909729 SK-MG-1     | nervous_system | glioma                        | -1,127369449 | 0,323884131 |
| 906839 DK-MG       | nervous_system | glioma                        | -0,728188679 | 0,482782673 |
| 905983 U251        | nervous_system | glioma                        | -0,569445759 | 0,565838963 |
| 906835 DBTRG-05MG  | nervous_system | glioma                        | -0,444548434 | 0,641113716 |
| 687561 42-MG-BA    | nervous_system | glioma                        | -0,174351787 | 0,840001344 |
| 910933 AM-38       | nervous_system | glioma                        | -0,076352226 | 0,926489815 |
| 687562 8-MG-BA     | nervous_system | glioma                        | 0,213262841  | 1,237709929 |
| 1240169 LN-229     | nervous_system | glioma                        | 0,25613063   | 1,291921481 |
| 687568 GB-1        | nervous_system | glioma                        | 0,471578189  | 1,60252128  |
| 905986 SF268       | nervous_system | glioma                        | 0,974232427  | 2,649133027 |
| 907271 KALS-1      | nervous_system | glioma                        | 1,024274157  | 2,785073201 |
| 687588 U-118-MG    | nervous_system | glioma                        | 1,268805726  | 3,556602467 |
| 687590 U-87-MG     | nervous_system | glioma                        | 2,130077981  | 8,415523037 |
| 907279 KINGS-1     | nervous_system | glioma                        | 2,405833003  | 11,08766249 |
| 1327775 KARPAS-620 | myeloma        | haematopoietic_neoplasm_other | -2,990932517 | 0,050240565 |
| 906856 EoL-1-cell  | leukemia       | haematopoietic_neoplasm_other | -2,077190278 | 0,125281725 |
| 1327766 JJN-3      | myeloma        | haematopoietic_neoplasm_other | -2,048184861 | 0,128968788 |
| 683665 MC-CAR      | myeloma        | haematopoietic_neoplasm_other | -2,015398841 | 0,13326724  |
| 908142 MLMA        | leukemia       | hairy_cell_leukaemia          | -2,153720211 | 0,116051617 |
| 907044 HC-1        | leukemia       | hairy_cell_leukaemia          | -0,717015045 | 0,48820736  |
| 753562 HSC-2       | aero_dig_tract | head_and_neck                 | -3,074993996 | 0,046189906 |
| 924111 HO-1-N-1    | aero_dig_tract | head_and_neck                 | -2,918432096 | 0,054018316 |
| 909708 SAS         | aero_dig_tract | head_and_neck                 | -2,597350715 | 0,074470611 |
| 753541 CAL-33      | aero_dig_tract | head_and_neck                 | -2,437309231 | 0,087395697 |

|                   |                |                  |              |             |
|-------------------|----------------|------------------|--------------|-------------|
| 910904 SCC-4      | aero_dig_tract | head_and_neck    | -2,412873025 | 0,089557623 |
| 910911 SCC-15     | aero_dig_tract | head_and_neck    | -2,396182183 | 0,09106496  |
| 753538 Ca9-22     | aero_dig_tract | head_and_neck    | -2,386856202 | 0,091918202 |
| 909709 SCC-9      | aero_dig_tract | head_and_neck    | -2,290922506 | 0,101173086 |
| 1240162 JHU-022   | aero_dig_tract | head_and_neck    | -2,158073016 | 0,115547565 |
| 907062 HSC-4      | aero_dig_tract | head_and_neck    | -2,150106038 | 0,116471807 |
| 753561 HO-1-u-1   | aero_dig_tract | head_and_neck    | -2,089262035 | 0,123778446 |
| 910936 DOK        | aero_dig_tract | head_and_neck    | -2,080821784 | 0,124827589 |
| 1240121 BICR22    | aero_dig_tract | head_and_neck    | -2,022481274 | 0,132326719 |
| 1290724 BICR10    | aero_dig_tract | head_and_neck    | -2,003908098 | 0,134807412 |
| 1240122 BICR78    | aero_dig_tract | head_and_neck    | -1,972370738 | 0,139126632 |
| 906837 Detroit562 | aero_dig_tract | head_and_neck    | -1,920960819 | 0,146466167 |
| 1240140 H3118     | aero_dig_tract | head_and_neck    | -1,751197035 | 0,173566054 |
| 907061 HSC-3      | aero_dig_tract | head_and_neck    | -1,72610049  | 0,177977082 |
| 753583 LB771-HNC  | aero_dig_tract | head_and_neck    | -1,519734889 | 0,218769878 |
| 753532 BB49-HNC   | aero_dig_tract | head_and_neck    | -1,38277684  | 0,250880929 |
| 906794 A253       | aero_dig_tract | head_and_neck    | -1,284746815 | 0,276720636 |
| 910916 CAL-27     | aero_dig_tract | head_and_neck    | -1,178348418 | 0,307786654 |
| 1240196 OSC-20    | aero_dig_tract | head_and_neck    | -1,010549963 | 0,364018728 |
| 1299050 SAT       | aero_dig_tract | head_and_neck    | -0,988270164 | 0,372220014 |
| 1298529 PCI-30    | aero_dig_tract | head_and_neck    | -0,235558565 | 0,790129388 |
| 906863 FADU       | aero_dig_tract | head_and_neck    | -0,040252651 | 0,960546725 |
| 1299059 SKN-3     | aero_dig_tract | head_and_neck    | 1,186851707  | 3,276748786 |
| 1330935 L-1236    | lymphoma       | Hodgkin_lymphoma | -2,650565891 | 0,070611243 |
| 907323 L-540      | lymphoma       | Hodgkin_lymphoma | -1,229019407 | 0,292579338 |
| 1331039 SUP-HD1   | lymphoma       | Hodgkin_lymphoma | -1,085907821 | 0,337595171 |
| 924110 HDLM-2     | lymphoma       | Hodgkin_lymphoma | -1,025354933 | 0,358669139 |
| 1322218 Hs-445    | lymphoma       | Hodgkin_lymphoma | 0,335083878  | 1,398057647 |
| 907322 L-428      | lymphoma       | Hodgkin_lymphoma | 1,075048697  | 2,930135586 |
| 907050 HD-MY-Z    | lymphoma       | Hodgkin_lymphoma | 1,273640853  | 3,573840733 |
| 753585 LB996-RCC  | kidney         | kidney           | -3,864714767 | 0,020968903 |
| 910952 CAL-54     | kidney         | kidney           | -3,303896846 | 0,036739719 |

|                     |                 |                 |              |             |
|---------------------|-----------------|-----------------|--------------|-------------|
| 910920 A704         | kidney          | kidney          | -2,491606679 | 0,082776864 |
| 905948 A498         | kidney          | kidney          | -1,23655811  | 0,290381963 |
| 910698 BFTC-909     | kidney          | kidney          | -0,845825028 | 0,429203108 |
| 1298168 KMRC-1      | kidney          | kidney          | -0,825916287 | 0,437833627 |
| 1298169 KMRC-20     | kidney          | kidney          | -0,269407097 | 0,763832239 |
| 905947 786-0        | kidney          | kidney          | -0,062774203 | 0,939155508 |
| 905980 TK10         | kidney          | kidney          | 0,080104353  | 1,083400118 |
| 909250 OS-RC-2      | kidney          | kidney          | 0,277836498  | 1,320270313 |
| 909781 VMRC-RCZ     | kidney          | kidney          | 0,651920083  | 1,91922236  |
| 909974 RCC10RGB     | kidney          | kidney          | 0,664058909  | 1,94266144  |
| 905979 SN12C        | kidney          | kidney          | 1,109105192  | 3,031644441 |
| 905950 ACHN         | kidney          | kidney          | 1,497541594  | 4,470684791 |
| 924108 CaR-1        | large_intestine | large_intestine | -3,977585133 | 0,018730817 |
| 907291 GP5d         | large_intestine | large_intestine | -3,686047334 | 0,025070903 |
| 909718 SK-CO-1      | large_intestine | large_intestine | -2,780719572 | 0,061993882 |
| 909757 SW948        | large_intestine | large_intestine | -2,709765702 | 0,066552398 |
| 1240123 CCK-81      | large_intestine | large_intestine | -2,538243143 | 0,079005079 |
| 909748 SW1463       | large_intestine | large_intestine | -2,512049588 | 0,081101843 |
| 910700 C2BBe1       | large_intestine | large_intestine | -2,329932329 | 0,097302331 |
| 907792 LS-123       | large_intestine | large_intestine | -2,217003597 | 0,108935034 |
| 907795 LS-513       | large_intestine | large_intestine | -2,01614319  | 0,13316808  |
| 909698 RKO          | large_intestine | large_intestine | -1,964742622 | 0,140191964 |
| 1240173 MDST8       | large_intestine | large_intestine | -1,837547763 | 0,159207362 |
| 905937 HCT-15       | large_intestine | large_intestine | -1,822089894 | 0,161687488 |
| 1290769 CL-11       | large_intestine | large_intestine | -1,696421446 | 0,183338438 |
| 905936 HCT-116      | large_intestine | large_intestine | -1,658706292 | 0,190385124 |
| 907790 LoVo         | large_intestine | large_intestine | -1,61862609  | 0,198170781 |
| 910569 COLO-320-HSR | large_intestine | large_intestine | -1,569071526 | 0,208238437 |
| 907287 HT55         | large_intestine | large_intestine | -1,53967425  | 0,214450947 |
| 1659928 SNU-175     | large_intestine | large_intestine | -1,526942191 | 0,217198805 |
| 909761 T84          | large_intestine | large_intestine | -1,477072709 | 0,228305026 |
| 910554 CW-2         | large_intestine | large_intestine | -1,431007223 | 0,239068006 |

|                 |                  |                 |              |             |
|-----------------|------------------|-----------------|--------------|-------------|
| 905939 HT-29    | large_intestine  | large_intestine | -1,379235094 | 0,251771061 |
| 908482 NCI-H630 | large_intestine  | large_intestine | -0,933982239 | 0,392985628 |
| 909755 SW837    | large_intestine  | large_intestine | -0,887504142 | 0,411681971 |
| 998189 LS-180   | large_intestine  | large_intestine | -0,828896113 | 0,436530901 |
| 908457 NCI-H747 | large_intestine  | large_intestine | -0,806003161 | 0,44663965  |
| 908458 NCI-H716 | large_intestine  | large_intestine | -0,607502537 | 0,544709564 |
| 909263 RCM-1    | large_intestine  | large_intestine | -0,576329658 | 0,561957161 |
| 917486 LS-1034  | large_intestine  | large_intestine | -0,376639919 | 0,686163104 |
| 905961 COLO-205 | large_intestine  | large_intestine | -0,314488013 | 0,730162612 |
| 1660035 SNU-61  | large_intestine  | large_intestine | -0,247803883 | 0,780513    |
| 909751 SW48     | large_intestine  | large_intestine | -0,228755407 | 0,795523089 |
| 909740 SNU-C2B  | large_intestine  | large_intestine | -0,104560285 | 0,900720496 |
| 907794 LS-411N  | large_intestine  | large_intestine | 0,108825394  | 1,114967653 |
| 905962 SW620    | large_intestine  | large_intestine | 0,173544698  | 1,189513854 |
| 1660034 SNU-407 | large_intestine  | large_intestine | 0,251962393  | 1,286547653 |
| 909746 SW1116   | large_intestine  | large_intestine | 0,40161697   | 1,494238885 |
| 905971 HCC2998  | large_intestine  | large_intestine | 0,444198295  | 1,559239644 |
| 1240124 CL-40   | large_intestine  | large_intestine | 0,55483537   | 1,741654233 |
| 910905 SNU-C1   | large_intestine  | large_intestine | 0,589125322  | 1,802411196 |
| 909747 SW1417   | large_intestine  | large_intestine | 0,730212901  | 2,075522441 |
| 905989 KM12     | large_intestine  | large_intestine | 1,385671696  | 3,997510115 |
| 1674021 SNU-C5  | large_intestine  | large_intestine | 1,481555911  | 4,399786034 |
| 910689 COLO-678 | large_intestine  | large_intestine | 3,265148714  | 26,18400463 |
| 907300 KY821    | leukemia         | leukemia        | -2,721530185 | 0,065774031 |
| 908156 MV-4-11  | leukemia         | leukemia        | -2,528180054 | 0,079804127 |
| 909703 RS4-11   | leukemia         | leukemia        | -0,245276846 | 0,78248788  |
| 907071 HuH-7    | digestive_system | liver           | -2,705185683 | 0,066857908 |
| 909737 SNU-423  | digestive_system | liver           | -1,211036916 | 0,297888234 |
| 907057 HLE      | digestive_system | liver           | -1,159559908 | 0,313624174 |
| 909738 SNU-449  | digestive_system | liver           | -0,554065823 | 0,574608797 |
| 1240160 JHH-7   | digestive_system | liver           | -0,494926167 | 0,609615915 |
| 1298151 JHH-1   | digestive_system | liver           | -0,26547442  | 0,766842058 |

|         |              |                  |                           |              |             |
|---------|--------------|------------------|---------------------------|--------------|-------------|
| 1240159 | JHH-6        | digestive_system | liver                     | -0,243722803 | 0,783704845 |
| 1240217 | SNU-398      | digestive_system | liver                     | -0,199222154 | 0,819367847 |
| 1298146 | huH-1        | digestive_system | liver                     | 0,10615749   | 1,111996991 |
| 909736  | SNU-387      | digestive_system | liver                     | 0,121424894  | 1,12910456  |
| 909719  | SK-HEP-1     | digestive_system | liver                     | 0,391148153  | 1,478677568 |
| 1240216 | SNU-182      | digestive_system | liver                     | 0,587215877  | 1,798972875 |
| 910850  | C3A          | digestive_system | liver                     | 1,880391287  | 6,556069665 |
| 1240145 | HCC-44       | lung_NSCLC       | lung_NSCLC_adenocarcinoma | -3,209261621 | 0,040386423 |
| 687799  | NCI-H1648    | lung_NSCLC       | lung_NSCLC_adenocarcinoma | -2,868906667 | 0,056760951 |
| 908474  | NCI-H1703    | lung_NSCLC       | lung_NSCLC_adenocarcinoma | -2,613543782 | 0,073274415 |
| 687798  | NCI-H1623    | lung_NSCLC       | lung_NSCLC_adenocarcinoma | -2,236381624 | 0,106844409 |
| 905949  | A549         | lung_NSCLC       | lung_NSCLC_adenocarcinoma | -2,228161546 | 0,107726298 |
| 724873  | NCI-H2009    | lung_NSCLC       | lung_NSCLC_adenocarcinoma | -2,195038758 | 0,111354246 |
| 724866  | NCI-H1355    | lung_NSCLC       | lung_NSCLC_adenocarcinoma | -2,150745291 | 0,116397376 |
| 1503370 | EMC-BAC-2    | lung_NSCLC       | lung_NSCLC_adenocarcinoma | -1,913958769 | 0,147495329 |
| 1240146 | HCC-827      | lung_NSCLC       | lung_NSCLC_adenocarcinoma | -1,693350598 | 0,183902308 |
| 908465  | NCI-H358     | lung_NSCLC       | lung_NSCLC_adenocarcinoma | -1,6277154   | 0,196377707 |
| 905942  | NCI-H23      | lung_NSCLC       | lung_NSCLC_adenocarcinoma | -1,605470884 | 0,200794982 |
| 753600  | NCI-H1563    | lung_NSCLC       | lung_NSCLC_adenocarcinoma | -1,567585876 | 0,208548036 |
| 908475  | NCI-H1755    | lung_NSCLC       | lung_NSCLC_adenocarcinoma | -1,506688061 | 0,221642831 |
| 1240187 | NCI-H2023    | lung_NSCLC       | lung_NSCLC_adenocarcinoma | -1,503753505 | 0,22229421  |
| 724868  | NCI-H1792    | lung_NSCLC       | lung_NSCLC_adenocarcinoma | -1,480842657 | 0,227445949 |
| 1298347 | NCI-H1435    | lung_NSCLC       | lung_NSCLC_adenocarcinoma | -1,392075894 | 0,248558787 |
| 687812  | NCI-H2085    | lung_NSCLC       | lung_NSCLC_adenocarcinoma | -1,298700618 | 0,272886146 |
| 1240185 | NCI-H1944    | lung_NSCLC       | lung_NSCLC_adenocarcinoma | -1,263038025 | 0,282793586 |
| 722046  | NCI-H2122    | lung_NSCLC       | lung_NSCLC_adenocarcinoma | -1,139295499 | 0,320044414 |
| 753608  | PC-14        | lung_NSCLC       | lung_NSCLC_adenocarcinoma | -1,052273277 | 0,349143147 |
| 724859  | Calu-6       | lung_NSCLC       | lung_NSCLC_adenocarcinoma | -1,038356714 | 0,354035987 |
| 905944  | NCI-H522     | lung_NSCLC       | lung_NSCLC_adenocarcinoma | -0,945072569 | 0,388651366 |
| 724834  | NCI-H2087    | lung_NSCLC       | lung_NSCLC_adenocarcinoma | -0,94295733  | 0,389474326 |
| 753592  | LXF-289      | lung_NSCLC       | lung_NSCLC_adenocarcinoma | -0,834661383 | 0,434021424 |
| 1240202 | PC-3_[JPC-3] | lung_NSCLC       | lung_NSCLC_adenocarcinoma | -0,779196815 | 0,458774344 |

|         |            |            |                           |              |             |
|---------|------------|------------|---------------------------|--------------|-------------|
| 908459  | NCI-H596   | lung_NSCLC | lung_NSCLC_adenocarcinoma | -0,757363848 | 0,468900893 |
| 908473  | NCI-H1666  | lung_NSCLC | lung_NSCLC_adenocarcinoma | -0,735528875 | 0,479251928 |
| 1290908 | HCC-78     | lung_NSCLC | lung_NSCLC_adenocarcinoma | -0,692616002 | 0,50026566  |
| 908476  | NCI-H1993  | lung_NSCLC | lung_NSCLC_adenocarcinoma | -0,644547134 | 0,524900198 |
| 908472  | NCI-H1573  | lung_NSCLC | lung_NSCLC_adenocarcinoma | -0,569346804 | 0,565894958 |
| 910900  | NCI-H1651  | lung_NSCLC | lung_NSCLC_adenocarcinoma | -0,088682683 | 0,915135916 |
| 905967  | NCI-H322M  | lung_NSCLC | lung_NSCLC_adenocarcinoma | -0,04094913  | 0,959877958 |
| 687802  | NCI-H1693  | lung_NSCLC | lung_NSCLC_adenocarcinoma | 0,014706323  | 1,014814993 |
| 905972  | HOP-62     | lung_NSCLC | lung_NSCLC_adenocarcinoma | 0,118867965  | 1,126221208 |
| 1240190 | NCI-H3122  | lung_NSCLC | lung_NSCLC_adenocarcinoma | 0,15501863   | 1,167679715 |
| 1298350 | NCI-H1781  | lung_NSCLC | lung_NSCLC_adenocarcinoma | 0,209207693  | 1,232700995 |
| 908460  | NCI-H441   | lung_NSCLC | lung_NSCLC_adenocarcinoma | 0,290621522  | 1,337258365 |
| 1298537 | RERF-LC-KJ | lung_NSCLC | lung_NSCLC_adenocarcinoma | 0,601171844  | 1,824255291 |
| 687819  | NCI-H2342  | lung_NSCLC | lung_NSCLC_adenocarcinoma | 0,665414312  | 1,945296314 |
| 909721  | SK-LU-1    | lung_NSCLC | lung_NSCLC_adenocarcinoma | 0,842356429  | 2,321831767 |
| 924244  | NCI-H1975  | lung_NSCLC | lung_NSCLC_adenocarcinoma | 1,104357681  | 3,017285786 |
| 908463  | NCI-H1793  | lung_NSCLC | lung_NSCLC_adenocarcinoma | 1,313421922  | 3,718877673 |
| 687816  | NCI-H2228  | lung_NSCLC | lung_NSCLC_adenocarcinoma | 1,324826362  | 3,761532153 |
| 687807  | NCI-H1838  | lung_NSCLC | lung_NSCLC_adenocarcinoma | 1,440752054  | 4,223871202 |
| 906805  | COR-L105   | lung_NSCLC | lung_NSCLC_adenocarcinoma | 1,501263854  | 4,487356852 |
| 724878  | SW1573     | lung_NSCLC | lung_NSCLC_adenocarcinoma | 2,109899402  | 8,24741157  |
| 722066  | NCI-H650   | lung_NSCLC | lung_NSCLC_adenocarcinoma | 2,920168043  | 18,54440346 |
| 687777  | Calu-3     | lung_NSCLC | lung_NSCLC_adenocarcinoma | 3,000397701  | 20,09352655 |
| 687800  | NCI-H1650  | lung_NSCLC | lung_NSCLC_adenocarcinoma | 3,484052476  | 32,59153122 |
| 687820  | NCI-H2347  | lung_NSCLC | lung_NSCLC_adenocarcinoma | 5,126727813  | 168,4649663 |
| 687821  | NCI-H2405  | lung_NSCLC | lung_NSCLC_adenocarcinoma | 5,278591408  | 196,093465  |
| 687600  | NCI-H720   | lung_NSCLC | lung_NSCLC_carcinoid      | -2,013019415 | 0,133584717 |
| 909779  | UMC-11     | lung_NSCLC | lung_NSCLC_carcinoid      | -1,366168694 | 0,255082388 |
| 724855  | NCI-H727   | lung_NSCLC | lung_NSCLC_carcinoid      | -0,47772792  | 0,620190916 |
| 753607  | NCI-H835   | lung_NSCLC | lung_NSCLC_carcinoid      | -0,352122764 | 0,70319379  |
| 908471  | NCI-H1581  | lung_NSCLC | lung_NSCLC_large_cell     | -1,395392099 | 0,24773588  |
| 687780  | COR-L23    | lung_NSCLC | lung_NSCLC_large_cell     | -1,257342988 | 0,284408701 |



|         |             |            |                                    |              |             |
|---------|-------------|------------|------------------------------------|--------------|-------------|
| 925341  | NCI-H810    | lung_NSCLC | lung_NSCLC_large_cell              | -1,233255416 | 0,291342591 |
| 907796  | LU-99A      | lung_NSCLC | lung_NSCLC_large_cell              | -0,876444233 | 0,416260408 |
| 724831  | NCI-H1299   | lung_NSCLC | lung_NSCLC_large_cell              | -0,837945365 | 0,432598443 |
| 724863  | LU-65       | lung_NSCLC | lung_NSCLC_large_cell              | -0,809962931 | 0,444874557 |
| 753586  | LCLC-103H   | lung_NSCLC | lung_NSCLC_large_cell              | -0,701702939 | 0,495740369 |
| 946361  | LCLC-97TM1  | lung_NSCLC | lung_NSCLC_large_cell              | -0,357620139 | 0,699338676 |
| 908467  | NCI-H1155   | lung_NSCLC | lung_NSCLC_large_cell              | 0,004972412  | 1,004984795 |
| 910779  | IA-LM       | lung_NSCLC | lung_NSCLC_large_cell              | 0,894784669  | 2,446808859 |
| 1240184 | NCI-H1915   | lung_NSCLC | lung_NSCLC_large_cell              | 1,142945546  | 3,135991983 |
| 905973  | HOP-92      | lung_NSCLC | lung_NSCLC_large_cell              | 2,011959615  | 7,477956915 |
| 687829  | NCI-H661    | lung_NSCLC | lung_NSCLC_large_cell              | 3,31881852   | 27,62768971 |
| 687815  | NCI-H2170   | lung_NSCLC | lung_NSCLC_squamous_cell_carcinoma | -2,065507813 | 0,126753907 |
| 1240142 | HARA        | lung_NSCLC | lung_NSCLC_squamous_cell_carcinoma | -1,526442885 | 0,217307281 |
| 753554  | EBC-1       | lung_NSCLC | lung_NSCLC_squamous_cell_carcinoma | -1,492422173 | 0,224827425 |
| 1298538 | RERF-LC-Sq1 | lung_NSCLC | lung_NSCLC_squamous_cell_carcinoma | -1,331105018 | 0,264185171 |
| 687787  | LK-2        | lung_NSCLC | lung_NSCLC_squamous_cell_carcinoma | -1,050433112 | 0,34978622  |
| 909728  | SK-MES-1    | lung_NSCLC | lung_NSCLC_squamous_cell_carcinoma | -0,861109525 | 0,422692834 |
| 753569  | KNS-62      | lung_NSCLC | lung_NSCLC_squamous_cell_carcinoma | -0,85394428  | 0,425732408 |
| 908443  | NCI-H520    | lung_NSCLC | lung_NSCLC_squamous_cell_carcinoma | -0,320501999 | 0,725784602 |
| 1240143 | HCC-15      | lung_NSCLC | lung_NSCLC_squamous_cell_carcinoma | -0,305851102 | 0,736496274 |
| 724879  | SW900       | lung_NSCLC | lung_NSCLC_squamous_cell_carcinoma | -0,250985718 | 0,778033483 |
| 753556  | EPLC-272H   | lung_NSCLC | lung_NSCLC_squamous_cell_carcinoma | 0,120637388  | 1,128215734 |
| 1298223 | LC-1-sq     | lung_NSCLC | lung_NSCLC_squamous_cell_carcinoma | 0,137375913  | 1,147259337 |
| 1298226 | LOU-NH91    | lung_NSCLC | lung_NSCLC_squamous_cell_carcinoma | 0,894567208  | 2,446276831 |
| 905941  | NCI-H226    | lung_NSCLC | lung_NSCLC_squamous_cell_carcinoma | 1,318420581  | 3,737513613 |
| 1240183 | NCI-H1869   | lung_NSCLC | lung_NSCLC_squamous_cell_carcinoma | 1,625332222  | 5,08010648  |
| 1240193 | NCI-H847    | lung_SCLC  | lung_small_cell_carcinoma          | -3,069722813 | 0,046434024 |
| 687980  | COR-L311    | lung_SCLC  | lung_small_cell_carcinoma          | -3,043448165 | 0,047670231 |
| 688001  | NCI-H1417   | lung_SCLC  | lung_small_cell_carcinoma          | -2,9630682   | 0,05166017  |
| 1330972 | NCI-H1876   | lung_SCLC  | lung_small_cell_carcinoma          | -2,927327194 | 0,053539949 |
| 688025  | NCI-H526    | lung_SCLC  | lung_small_cell_carcinoma          | -2,685643727 | 0,068177292 |
| 753610  | SBC-3       | lung_SCLC  | lung_small_cell_carcinoma          | -2,208804754 | 0,109831846 |

|         |           |           |                           |              |             |
|---------|-----------|-----------|---------------------------|--------------|-------------|
| 908483  | NCI-H524  | lung_SCLC | lung_small_cell_carcinoma | -2,045044746 | 0,129374401 |
| 910937  | COR-L279  | lung_SCLC | lung_small_cell_carcinoma | -1,907982646 | 0,148379419 |
| 688027  | NCI-H69   | lung_SCLC | lung_small_cell_carcinoma | -1,847947168 | 0,157560279 |
| 753594  | MS-1      | lung_SCLC | lung_small_cell_carcinoma | -1,716752107 | 0,179648681 |
| 688031  | NCI-H82   | lung_SCLC | lung_small_cell_carcinoma | -1,676751684 | 0,186980362 |
| 713899  | LU-135    | lung_SCLC | lung_small_cell_carcinoma | -1,660315094 | 0,190079078 |
| 1330964 | NCI-H1341 | lung_SCLC | lung_small_cell_carcinoma | -1,590927807 | 0,203736496 |
| 1240192 | NCI-H841  | lung_SCLC | lung_small_cell_carcinoma | -1,404634644 | 0,245456719 |
| 753547  | CPC-N     | lung_SCLC | lung_small_cell_carcinoma | -1,210768672 | 0,297968152 |
| 688014  | NCI-H2141 | lung_SCLC | lung_small_cell_carcinoma | -1,158780138 | 0,313868824 |
| 1330973 | NCI-H2066 | lung_SCLC | lung_small_cell_carcinoma | -1,145664849 | 0,318012417 |
| 687995  | NCI-H1048 | lung_SCLC | lung_small_cell_carcinoma | -1,137079812 | 0,320754318 |
| 910692  | COLO-668  | lung_SCLC | lung_small_cell_carcinoma | -1,11644564  | 0,327441574 |
| 713878  | LU-139    | lung_SCLC | lung_small_cell_carcinoma | -0,969964059 | 0,379096663 |
| 688023  | NCI-H446  | lung_SCLC | lung_small_cell_carcinoma | -0,962110126 | 0,382085786 |
| 688006  | NCI-H1694 | lung_SCLC | lung_small_cell_carcinoma | -0,810598876 | 0,444591731 |
| 687983  | DMS-114   | lung_SCLC | lung_small_cell_carcinoma | -0,768888938 | 0,46352779  |
| 688013  | NCI-H209  | lung_SCLC | lung_small_cell_carcinoma | -0,468704812 | 0,625812288 |
| 688026  | NCI-H64   | lung_SCLC | lung_small_cell_carcinoma | -0,460014914 | 0,631274231 |
| 907295  | DMS-53    | lung_SCLC | lung_small_cell_carcinoma | -0,323329452 | 0,723735379 |
| 1240189 | NCI-H211  | lung_SCLC | lung_small_cell_carcinoma | -0,283430588 | 0,753195401 |
| 687997  | NCI-H1092 | lung_SCLC | lung_small_cell_carcinoma | -0,251072901 | 0,777965655 |
| 1240186 | NCI-H196  | lung_SCLC | lung_small_cell_carcinoma | -0,211800835 | 0,809125831 |
| 1298349 | NCI-H1688 | lung_SCLC | lung_small_cell_carcinoma | -0,065017128 | 0,937051413 |
| 687985  | DMS-273   | lung_SCLC | lung_small_cell_carcinoma | 0,129691328  | 1,138476913 |
| 724872  | SHP-77    | lung_SCLC | lung_small_cell_carcinoma | 0,430279622  | 1,537687435 |
| 1297439 | COR-L95   | lung_SCLC | lung_small_cell_carcinoma | 0,437177533  | 1,548330932 |
| 713880  | SBC-5     | lung_SCLC | lung_small_cell_carcinoma | 0,522044633  | 1,685470297 |
| 688010  | NCI-H1963 | lung_SCLC | lung_small_cell_carcinoma | 0,535479444  | 1,708267064 |
| 1299062 | SW1271    | lung_SCLC | lung_small_cell_carcinoma | 0,752190269  | 2,121641898 |
| 753589  | LU-165    | lung_SCLC | lung_small_cell_carcinoma | 1,265655594  | 3,545416328 |
| 906808  | COR-L88   | lung_SCLC | lung_small_cell_carcinoma | 1,814517783  | 6,13811556  |

|         |              |                |                                |              |             |
|---------|--------------|----------------|--------------------------------|--------------|-------------|
| 949153  | HAL-01       | leukemia       | lymphoblastic_leukemia         | -3,501360535 | 0,030156327 |
| 910944  | ALL-PO       | leukemia       | lymphoblastic_leukemia         | -3,026554066 | 0,048482418 |
| 1247871 | SUP-B15      | leukemia       | lymphoblastic_leukemia         | -2,915989501 | 0,054150423 |
| 905958  | MOLT-4       | leukemia       | lymphoblastic_leukemia         | -2,471281645 | 0,084476521 |
| 906877  | GR-ST        | leukemia       | lymphoblastic_leukemia         | -2,205223577 | 0,110225879 |
| 907272  | KARPAS-45    | leukemia       | lymphoblastic_leukemia         | -2,173512334 | 0,11377729  |
| 907787  | LC4-1        | leukemia       | lymphoblastic_leukemia         | -2,118498801 | 0,120211955 |
| 906763  | BE-13        | leukemia       | lymphoblastic_leukemia         | -1,917681728 | 0,146947231 |
| 907277  | KE-37        | leukemia       | lymphoblastic_leukemia         | -1,890821123 | 0,150947811 |
| 909252  | P30-OHK      | leukemia       | lymphoblastic_leukemia         | -1,600104895 | 0,201875341 |
| 906800  |              | 697 leukemia   | lymphoblastic_leukemia         | -1,385082802 | 0,250303073 |
| 905952  | CCRF-CEM     | leukemia       | lymphoblastic_leukemia         | -1,215720778 | 0,296496229 |
| 908147  | MOLT-16      | leukemia       | lymphoblastic_T_cell_leukaemia | -3,347339267 | 0,035177828 |
| 910687  | ATN-1        | leukemia       | lymphoblastic_T_cell_leukaemia | -2,707290664 | 0,066717322 |
| 909702  | RPMI-8402    | leukemia       | lymphoblastic_T_cell_leukaemia | -2,64731523  | 0,07084115  |
| 909743  | SUP-T1       | leukemia       | lymphoblastic_T_cell_leukaemia | -1,877403972 | 0,152986749 |
| 907789  | LOUCY        | leukemia       | lymphoblastic_T_cell_leukaemia | -1,785270557 | 0,167751668 |
| 909251  | P12-ICHIKAWA | leukemia       | lymphoblastic_T_cell_leukaemia | -1,134110852 | 0,32170804  |
| 909260  | PF-382       | leukemia       | lymphoblastic_T_cell_leukaemia | -0,88756733  | 0,411655959 |
| 908146  | MOLT-13      | leukemia       | lymphoblastic_T_cell_leukaemia | -0,162999851 | 0,849591315 |
| 909785  | WSU-NHL      | lymphoma       | lymphoid_neoplasm_other        | -5,336176433 | 0,004814243 |
| 946358  | YT           | lymphoma       | lymphoid_neoplasm_other        | -2,465932448 | 0,084929613 |
| 907270  | JVM-3        | lymphoma       | lymphoid_neoplasm_other        | -2,416677376 | 0,089217562 |
| 907043  | H9           | lymphoma       | lymphoid_neoplasm_other        | -1,844497982 | 0,158104672 |
| 1331049 | WIL2-NS      | lymphoma       | lymphoid_neoplasm_other        | -1,344265713 | 0,260731089 |
| 906836  | DEL          | lymphoma       | lymphoid_neoplasm_other        | -1,189058597 | 0,304507794 |
| 1297447 | EJM          | myeloma        | lymphoid_neoplasm_other        | -0,625566058 | 0,534958525 |
| 906834  | D-283MED     | nervous_system | medulloblastoma                | -3,33029133  | 0,035782679 |
| 906833  | Daoy         | nervous_system | medulloblastoma                | -0,503847237 | 0,604201675 |
| 909248  | ONS-76       | nervous_system | medulloblastoma                | 0,334247733  | 1,396889156 |
| 905974  | LOXIMVI      | skin           | melanoma                       | -3,048129574 | 0,047447589 |
| 1299078 | WM1552C      | skin           | melanoma                       | -2,509320384 | 0,081323489 |

|                  |      |              |              |             |
|------------------|------|--------------|--------------|-------------|
| 910903 RPMI-7951 | skin | melanoma     | -2,445458231 | 0,086686403 |
| 907172 IST-MEL1  | skin | melanoma     | -2,406223803 | 0,090155096 |
| 910853 CHL-1     | skin | melanoma     | -1,990523574 | 0,136623874 |
| 910921 A101D     | skin | melanoma     | -1,812019941 | 0,163323899 |
| 906792 A2058     | skin | melanoma     | -1,740624105 | 0,175410892 |
| 908128 Mewo      | skin | melanoma     | -1,251720851 | 0,286012189 |
| 907169 IGR-1     | skin | melanoma     | -1,120666165 | 0,326062511 |
| 906814 COLO-792  | skin | melanoma     | -1,112162408 | 0,32884709  |
| 909725 SK-MEL-24 | skin | melanoma     | -0,819685727 | 0,440570092 |
| 1240153 IGR-37   | skin | melanoma     | -0,746038946 | 0,474241333 |
| 1299081 WM793B   | skin | melanoma     | -0,685933051 | 0,503620107 |
| 906793 A375      | skin | melanoma     | -0,475439311 | 0,621611916 |
| 909713 SH-4      | skin | melanoma     | -0,376172413 | 0,686483964 |
| 910932 GAK       | skin | melanoma     | -0,358798422 | 0,698515142 |
| 909784 WM-115    | skin | melanoma     | -0,34713143  | 0,706712439 |
| 907067 HT-144    | skin | melanoma     | -0,197701309 | 0,820614927 |
| 905955 SK-MEL-2  | skin | melanoma     | -0,132013222 | 0,876329408 |
| 905976 UACC-62   | skin | melanoma     | -0,063309611 | 0,938652811 |
| 909723 SK-MEL-1  | skin | melanoma     | 0,124699895  | 1,132808441 |
| 906865 G-361     | skin | melanoma     | 0,265473516  | 1,304048317 |
| 907058 H MV-II   | skin | melanoma     | 0,306986292  | 1,359322334 |
| 908125 MEL-JUSO  | skin | melanoma     | 0,584249508  | 1,793644365 |
| 905975 M14       | skin | melanoma     | 0,666078183  | 1,946588169 |
| 1299080 WM35     | skin | melanoma     | 0,672513999  | 1,959156452 |
| 906830 C32       | skin | melanoma     | 0,877090589  | 2,403895602 |
| 905977 UACC-257  | skin | melanoma     | 1,475873001  | 4,374853358 |
| 1240226 WM278    | skin | melanoma     | 1,919026223  | 6,81431961  |
| 906818 COLO-679  | skin | melanoma     | 2,977835121  | 19,64524101 |
| 687448 COLO-829  | skin | melanoma     | 3,410590699  | 30,28312719 |
| 908150 MPP-89    | lung | mesothelioma | -2,199933976 | 0,110810474 |
| 1290813 H2795    | lung | mesothelioma | -0,946877277 | 0,387950596 |
| 908462 NCI-H2452 | lung | mesothelioma | -0,884945916 | 0,412736495 |

|                    |               |               |              |             |
|--------------------|---------------|---------------|--------------|-------------|
| 1290810 H2461      | lung          | mesothelioma  | -0,769616964 | 0,463190453 |
| 1240141 H513       | lung          | mesothelioma  | -0,605479457 | 0,54581267  |
| 1240134 H2731      | lung          | mesothelioma  | -0,240206731 | 0,786465258 |
| 908470 NCI-H28     | lung          | mesothelioma  | -0,088616956 | 0,915196067 |
| 1290814 H2818      | lung          | mesothelioma  | 1,135953722  | 3,114142153 |
| 688058 NCI-H2052   | lung          | mesothelioma  | 1,404331919  | 4,072804869 |
| 1290812 H2722      | lung          | mesothelioma  | 2,034068424  | 7,64512679  |
| 1240132 H2595      | lung          | mesothelioma  | 2,194218895  | 8,972989472 |
| 907173 IST-MES1    | lung          | mesothelioma  | 2,434385932  | 11,40881078 |
| 1240131 H2591      | lung          | mesothelioma  | 5,783150676  | 324,7808594 |
| 724825 NCI-H929    | myeloma       | myeloma       | -3,328639343 | 0,03584184  |
| 905964 RPMI-8226   | myeloma       | myeloma       | -2,942884381 | 0,052713464 |
| 907281 KMS-12-BM   | myeloma       | myeloma       | -2,790627688 | 0,061382673 |
| 1330950 MOLP-8     | myeloma       | myeloma       | -2,75398209  | 0,063673801 |
| 753563 IM-9        | myeloma       | myeloma       | -2,217769162 | 0,108851669 |
| 909249 OPM-2       | myeloma       | myeloma       | -1,783460553 | 0,168055575 |
| 1659818 MM1S       | myeloma       | myeloma       | -1,606817363 | 0,200524797 |
| 924239 L-363       | myeloma       | myeloma       | -1,455088915 | 0,233379612 |
| 906765 ARH-77      | myeloma       | myeloma       | -1,049133504 | 0,3502411   |
| 753615 U-266       | myeloma       | myeloma       | -0,933037373 | 0,393357122 |
| 753612 SK-MM-2     | myeloma       | myeloma       | -0,481618165 | 0,617782908 |
| 910780 TGW         | neuroblastoma | neuroblastoma | -4,305238578 | 0,013497665 |
| 949178 NB14        | neuroblastoma | neuroblastoma | -4,149448648 | 0,015773111 |
| 906820 CHP-212     | neuroblastoma | neuroblastoma | -3,586922465 | 0,027683396 |
| 949172 NB12        | neuroblastoma | neuroblastoma | -3,509035077 | 0,029925777 |
| 906875 GOTO        | neuroblastoma | neuroblastoma | -3,386447576 | 0,033828637 |
| 908447 NH-12       | neuroblastoma | neuroblastoma | -3,231114533 | 0,039513435 |
| 1240181 NB(TU)1-10 | neuroblastoma | neuroblastoma | -3,117854837 | 0,044251994 |
| 717431 SK-N-SH     | neuroblastoma | neuroblastoma | -3,085670427 | 0,045699386 |
| 949174 NB7         | neuroblastoma | neuroblastoma | -2,94783977  | 0,052452894 |
| 753616 BE2-M17     | neuroblastoma | neuroblastoma | -2,607431434 | 0,073723665 |
| 949177 NB13        | neuroblastoma | neuroblastoma | -2,399260957 | 0,090785023 |

|                  |                |               |              |             |
|------------------|----------------|---------------|--------------|-------------|
| 753618 KELLY     | neuroblastoma  | neuroblastoma | -2,207741479 | 0,10994869  |
| 688086 SK-N-DZ   | neuroblastoma  | neuroblastoma | -2,035240077 | 0,130649113 |
| 688087 SK-N-FI   | neuroblastoma  | neuroblastoma | -1,786817983 | 0,167492286 |
| 907170 IMR-5     | neuroblastoma  | neuroblastoma | -0,744715549 | 0,474869358 |
| 724828           | neuroblastoma  | neuroblastoma | -0,131451328 | 0,876821951 |
| 1299064 T-T      | aero_dig_tract | oesophagus    | -3,046929217 | 0,047504577 |
| 907319 KYSE-270  | aero_dig_tract | oesophagus    | -3,046506992 | 0,047524639 |
| 1503368 KYAE-1   | aero_dig_tract | oesophagus    | -2,819936675 | 0,059609717 |
| 753555 EC-GI-10  | aero_dig_tract | oesophagus    | -2,321443702 | 0,09813181  |
| 1503361 FLO-1    | aero_dig_tract | oesophagus    | -2,232756905 | 0,107232393 |
| 753614 TE-15     | aero_dig_tract | oesophagus    | -2,120804915 | 0,119935052 |
| 753623 TE-8      | aero_dig_tract | oesophagus    | -1,888868222 | 0,151242885 |
| 1503365 SK-GT-4  | aero_dig_tract | oesophagus    | -1,823622903 | 0,161439809 |
| 1503371 TE-4     | aero_dig_tract | oesophagus    | -1,650564341 | 0,191941558 |
| 1298222 KYSE-50  | aero_dig_tract | oesophagus    | -1,576636442 | 0,206669074 |
| 735784 TE-5      | aero_dig_tract | oesophagus    | -1,538555255 | 0,214691051 |
| 946353 TE-9      | aero_dig_tract | oesophagus    | -1,469437475 | 0,23005486  |
| 907320 KYSE-450  | aero_dig_tract | oesophagus    | -1,388974064 | 0,249330971 |
| 753621 TE-1      | aero_dig_tract | oesophagus    | -1,180311525 | 0,307183029 |
| 753575 KYSE-520  | aero_dig_tract | oesophagus    | -0,935588407 | 0,392354933 |
| 910549 OE33      | aero_dig_tract | oesophagus    | -0,85238435  | 0,426397039 |
| 1240167 KYSE-220 | aero_dig_tract | oesophagus    | -0,72213815  | 0,485712618 |
| 1503363 OACM5-1  | aero_dig_tract | oesophagus    | -0,681593015 | 0,505810586 |
| 910079 OE19      | aero_dig_tract | oesophagus    | -0,676309965 | 0,50848988  |
| 907317 KYSE-150  | aero_dig_tract | oesophagus    | -0,520615082 | 0,594154982 |
| 753573 KYSE-140  | aero_dig_tract | oesophagus    | -0,393575912 | 0,674640102 |
| 907318 KYSE-180  | aero_dig_tract | oesophagus    | -0,311412544 | 0,732411661 |
| 1503366 ESO26    | aero_dig_tract | oesophagus    | -0,308185811 | 0,734778775 |
| 753576 KYSE-70   | aero_dig_tract | oesophagus    | 0,24874752   | 1,282418207 |
| 1503367 ESO51    | aero_dig_tract | oesophagus    | 0,293430808  | 1,341020388 |
| 1298359 OE21     | aero_dig_tract | oesophagus    | 0,314409796  | 1,369450817 |
| 946355 TE-6      | aero_dig_tract | oesophagus    | 0,341879413  | 1,40759055  |

|         |           |                   |              |              |             |
|---------|-----------|-------------------|--------------|--------------|-------------|
| 906817  | COLO-680N | aero_dig_tract    | oesophagus   | 0,979415422  | 2,662899115 |
| 753574  | KYSE-410  | aero_dig_tract    | oesophagus   | 1,419124739  | 4,133500964 |
| 909707  | Saos-2    | bone              | osteosarcoma | -2,405492491 | 0,090221052 |
| 909977  | HuO-3N1   | bone              | osteosarcoma | -2,289171261 | 0,10135042  |
| 925345  | NOS-1     | bone              | osteosarcoma | -2,084121767 | 0,124416339 |
| 910849  | NY        | bone              | osteosarcoma | -1,860498567 | 0,155595036 |
| 906827  | CAL-72    | bone              | osteosarcoma | -1,542405402 | 0,213866048 |
| 907072  | HuO9      | bone              | osteosarcoma | -1,27975121  | 0,278106482 |
| 907060  | HOS       | bone              | osteosarcoma | -1,202690831 | 0,300384839 |
| 909776  | U-2-OS    | bone              | osteosarcoma | 0,4995679    | 1,648009012 |
| 909255  | PA-1      | urogenital_system | ovary        | -3,287549132 | 0,037345266 |
| 905968  | IGROV-1   | urogenital_system | ovary        | -2,672227122 | 0,069098164 |
| 1480372 | PEO1      | urogenital_system | ovary        | -2,379608445 | 0,092586823 |
| 1479987 | DOV13     | urogenital_system | ovary        | -2,203529841 | 0,11041273  |
| 1240129 | FU-OV-1   | urogenital_system | ovary        | -2,161872031 | 0,115109431 |
| 1240222 | TOV-21G   | urogenital_system | ovary        | -2,155286666 | 0,11586997  |
| 905933  | OVCAR-3   | urogenital_system | ovary        | -1,985657705 | 0,137290288 |
| 1298365 | OVTOKO    | urogenital_system | ovary        | -1,968740651 | 0,139632592 |
| 1480362 | OV-56     | urogenital_system | ovary        | -1,904172694 | 0,148945815 |
| 909975  | KURAMOCHI | urogenital_system | ovary        | -1,831428981 | 0,160184504 |
| 910548  | OAW-42    | urogenital_system | ovary        | -1,701146993 | 0,182474107 |
| 949090  | Caov-4    | urogenital_system | ovary        | -1,6702779   | 0,188194759 |
| 1240200 | OVMIU     | urogenital_system | ovary        | -1,611412764 | 0,199605419 |
| 946360  | OAW-28    | urogenital_system | ovary        | -1,609058399 | 0,200075917 |
| 906804  | A2780     | urogenital_system | ovary        | -1,443660234 | 0,236062133 |
| 905969  | OVCAR-5   | urogenital_system | ovary        | -1,419146489 | 0,241920411 |
| 909699  | RMG-I     | urogenital_system | ovary        | -1,350977936 | 0,258986864 |
| 1240197 | OV-90     | urogenital_system | ovary        | -1,325464733 | 0,26567946  |
| 1299070 | TOV-112D  | urogenital_system | ovary        | -1,209126476 | 0,298457876 |
| 909257  | OC-314    | urogenital_system | ovary        | -1,061552172 | 0,345918468 |
| 924186  | KGN       | urogenital_system | ovary        | -0,79055982  | 0,453590795 |
| 1298539 | RKN       | urogenital_system | ovary        | -0,736075942 | 0,478989816 |

|         |             |                   |          |              |             |
|---------|-------------|-------------------|----------|--------------|-------------|
| 905991  | OVCAR-8     | urogenital_system | ovary    | -0,405901809 | 0,666375596 |
| 909774  | TYK-nu      | urogenital_system | ovary    | 0,015500577  | 1,015621334 |
| 1240199 | OVKATE      | urogenital_system | ovary    | 0,281264301  | 1,324803705 |
| 1240198 | OVISE       | urogenital_system | ovary    | 0,34068541   | 1,405910886 |
| 1480364 | OVCA420     | urogenital_system | ovary    | 0,423035209  | 1,526588045 |
| 909753  | SW626       | urogenital_system | ovary    | 0,468380204  | 1,597404627 |
| 1479988 | Hey         | urogenital_system | ovary    | 0,499403556  | 1,647738194 |
| 905990  | OVCAR-4     | urogenital_system | ovary    | 0,678719663  | 1,971352121 |
| 905959  | SK-OV-3     | urogenital_system | ovary    | 0,985288053  | 2,678583347 |
| 1240128 | ES-2        | urogenital_system | ovary    | 1,638738372  | 5,148669707 |
| 1290797 | DAN-G       | pancreas          | pancreas | -1,74731325  | 0,174241458 |
| 925346  | PANC-03-27  | pancreas          | pancreas | -1,706546515 | 0,18149149  |
| 753624  | CAPAN-1     | pancreas          | pancreas | -1,553420878 | 0,21152314  |
| 724869  | HPAF-II     | pancreas          | pancreas | -1,525686423 | 0,217471728 |
| 907286  | HuP-T4      | pancreas          | pancreas | -1,516324601 | 0,219517219 |
| 753572  | KP-4        | pancreas          | pancreas | -1,514321017 | 0,219957482 |
| 1298136 | HPAC        | pancreas          | pancreas | -1,398085696 | 0,247069478 |
| 1298216 | KP-1N       | pancreas          | pancreas | -1,354313942 | 0,258124322 |
| 906693  | BxPC-3      | pancreas          | pancreas | -1,021521771 | 0,360046615 |
| 1298526 | PA-TU-8902  | pancreas          | pancreas | -0,876707561 | 0,41615081  |
| 907285  | HuP-T3      | pancreas          | pancreas | -0,814143669 | 0,443018535 |
| 910915  | Capan-2     | pancreas          | pancreas | -0,690050703 | 0,501550638 |
| 925348  | PANC-10-05  | pancreas          | pancreas | -0,588439469 | 0,555193005 |
| 906821  | CFPAC-1     | pancreas          | pancreas | -0,473991902 | 0,622512294 |
| 1298475 | PANC-02-03  | pancreas          | pancreas | -0,337128293 | 0,713817256 |
| 1298533 | PL4         | pancreas          | pancreas | -0,198421367 | 0,820024249 |
| 1240208 | PL18        | pancreas          | pancreas | -0,193277986 | 0,824252812 |
| 909904  | YAPC        | pancreas          | pancreas | 0,359856821  | 1,433124207 |
| 1298476 | PANC-04-03  | pancreas          | pancreas | 0,368434642  | 1,445470165 |
| 910546  | PSN1        | pancreas          | pancreas | 0,468234984  | 1,597172669 |
| 925347  | PANC-08-13  | pancreas          | pancreas | 0,680221565  | 1,974315123 |
| 1240201 | PA-TU-8988T | pancreas          | pancreas | 0,873749455  | 2,395877267 |



|         |                 |                   |                   |              |             |
|---------|-----------------|-------------------|-------------------|--------------|-------------|
| 1240218 | SU8686          | pancreas          | pancreas          | 1,033819199  | 2,811784117 |
| 1298141 | Hs-766T         | pancreas          | pancreas          | 1,058669563  | 2,882533408 |
| 910907  | SW1990          | pancreas          | pancreas          | 1,210045878  | 3,353638507 |
| 1240219 | SUIT-2          | pancreas          | pancreas          | 2,000518683  | 7,392889671 |
| 724870  | MIA-PaCa-2      | pancreas          | pancreas          | 3,094697874  | 22,08056642 |
| 1298219 | KP-3            | pancreas          | pancreas          | 4,317944356  | 75,03422599 |
| 910702  | AsPC-1          | pancreas          | pancreas          | 5,253580292  | 191,2497742 |
| 1299075 | VCaP            | urogenital_system | prostate          | -1,808352622 | 0,163923959 |
| 907788  | LNCaP-Clone-FGC | urogenital_system | prostate          | -1,23842222  | 0,289841163 |
| 924100  | 22RV1           | urogenital_system | prostate          | -0,980889549 | 0,37497739  |
| 905934  | PC-3            | urogenital_system | prostate          | -0,15330835  | 0,857865158 |
| 905935  | DU-145          | urogenital_system | prostate          | 0,286573167  | 1,331855612 |
| 684052  | A673            | soft_tissue       | rhabdomyosarcoma  | -2,133396086 | 0,118434397 |
| 909264  | RD              | soft_tissue       | rhabdomyosarcoma  | -1,734968546 | 0,176405749 |
| 1240166 | KYM-1           | soft_tissue       | rhabdomyosarcoma  | -1,555167663 | 0,211153977 |
| 1240210 | RH-41           | soft_tissue       | rhabdomyosarcoma  | -0,929679959 | 0,394680004 |
| 910784  | A204            | soft_tissue       | rhabdomyosarcoma  | -0,902871681 | 0,405403796 |
| 971773  | RH-1            | soft_tissue       | rhabdomyosarcoma  | -0,780365881 | 0,45823832  |
| 909716  | SJRH30          | soft_tissue       | rhabdomyosarcoma  | -0,477640342 | 0,620245233 |
| 909756  | SW872           | soft_tissue       | soft_tissue_other | -2,299492346 | 0,100309753 |
| 909759  | SW982           | soft_tissue       | soft_tissue_other | -1,402975589 | 0,245864283 |
| 909732  | SK-UT-1         | soft_tissue       | soft_tissue_other | -1,000720498 | 0,36761448  |
| 906999  | GCT             | soft_tissue       | soft_tissue_other | -0,945190268 | 0,388605625 |
| 909720  | SK-LMS-1        | soft_tissue       | soft_tissue_other | -0,73284097  | 0,480541844 |
| 688121  | VA-ES-BJ        | soft_tissue       | soft_tissue_other | -0,224009864 | 0,79930725  |
| 925343  | MFH-ino         | soft_tissue       | soft_tissue_other | 1,464319569  | 4,324599647 |
| 906790  | AGS             | digestive_system  | stomach           | -3,48241553  | 0,030733085 |
| 906869  | GCIY            | digestive_system  | stomach           | -2,964210201 | 0,051601208 |
| 907055  | HGC-27          | digestive_system  | stomach           | -2,909045917 | 0,054527729 |
| 1322224 | HSC-39          | digestive_system  | stomach           | -2,895347823 | 0,055279794 |
| 1290806 | FU97            | digestive_system  | stomach           | -2,862597932 | 0,057120173 |
| 910924  | 23132-87        | digestive_system  | stomach           | -2,278388294 | 0,102449192 |

|         |               |                   |                 |              |             |
|---------|---------------|-------------------|-----------------|--------------|-------------|
| 908446  | NCI-SNU-16    | digestive_system  | stomach         | -2,20081302  | 0,11071311  |
| 908461  | NCI-N87       | digestive_system  | stomach         | -1,864608267 | 0,1549569   |
| 908445  | NCI-SNU-5     | digestive_system  | stomach         | -1,845111288 | 0,158007736 |
| 1240209 | RERF-GC-1B    | digestive_system  | stomach         | -1,809299886 | 0,163768753 |
| 909770  | TGBC11TKB     | digestive_system  | stomach         | -1,585039615 | 0,204939674 |
| 908444  | NCI-SNU-1     | digestive_system  | stomach         | -1,541570033 | 0,21404478  |
| 909697  | RF-48         | digestive_system  | stomach         | -1,327259905 | 0,265202948 |
| 908138  | MKN1          | digestive_system  | stomach         | -1,185625214 | 0,305555082 |
| 1503364 | SK-GT-2       | digestive_system  | stomach         | -0,91765655  | 0,399454046 |
| 908455  | NUGC-3        | digestive_system  | stomach         | -0,8571901   | 0,424352798 |
| 906848  | ECC10         | digestive_system  | stomach         | -0,741336643 | 0,476476611 |
| 1240155 | IM-95         | digestive_system  | stomach         | -0,739897961 | 0,477162602 |
| 925340  | MKN45         | digestive_system  | stomach         | -0,665430701 | 0,514052077 |
| 1240151 | Hs746T        | digestive_system  | stomach         | 0,396978259  | 1,487323594 |
| 908139  | MKN28         | digestive_system  | stomach         | 0,985834819  | 2,680048306 |
| 1298358 | OCUM-1        | digestive_system  | stomach         | 2,233106113  | 9,328797423 |
| 907276  | KATOIII       | digestive_system  | stomach         | 4,11087559   | 61,00010528 |
| 1298357 | NUGC-4        | digestive_system  | stomach         | 6,004783257  | 405,3631196 |
| 998184  | Jurkat        | leukemia          | T_cell_leukemia | -2,416399912 | 0,08924232  |
| 1297446 | DND-41        | leukemia          | T_cell_leukemia | -1,616338806 | 0,198624573 |
| 907056  | HH            | leukemia          | T_cell_leukemia | -1,027235024 | 0,357995442 |
| 1295740 | ALL-SIL       | leukemia          | T_cell_leukemia | -0,955787571 | 0,384509197 |
| 908454  | NTERA-S-cl-D1 | urogenital_system | testis          | -3,270109036 | 0,038002283 |
| 910942  | NEC8          | urogenital_system | testis          | -2,207108379 | 0,11001832  |
| 1240154 | IHH-4         | thyroid           | thyroid         | -2,032090618 | 0,131061236 |
| 906795  | 8305C         | thyroid           | thyroid         | -1,68035304  | 0,18630819  |
| 924238  | K5            | thyroid           | thyroid         | -1,312904314 | 0,269037551 |
| 906828  | CAL-62        | thyroid           | thyroid         | -1,129067344 | 0,323334676 |
| 1290722 | ASH-3         | thyroid           | thyroid         | -0,849823941 | 0,427490189 |
| 924102  | 8505C         | thyroid           | thyroid         | -0,79875015  | 0,449890909 |
| 930299  | TT            | thyroid           | thyroid         | -0,727032077 | 0,483341383 |
| 924104  | BCPAP         | thyroid           | thyroid         | -0,597689525 | 0,550081118 |

|         |            |                   |         |              |             |
|---------|------------|-------------------|---------|--------------|-------------|
| 1240223 | TT2609-C02 | thyroid           | thyroid | -0,176622889 | 0,83809578  |
| 906864  | FTC-133    | thyroid           | thyroid | 0,014620444  | 1,014727845 |
| 924151  | HTC-C3     | thyroid           | thyroid | 0,144538708  | 1,155506421 |
| 910568  | CGTH-W-1   | thyroid           | thyroid | 0,224204425  | 1,251326796 |
| 906696  | BHT-101    | thyroid           | thyroid | 0,396758938  | 1,486997428 |
| 1240215 | SKN        | urogenital_system | uterus  | -0,624654626 | 0,535446326 |
| 908127  | MES-SA     | urogenital_system | uterus  | 0,858728283  | 2,360157332 |

## Screening IBL-302 across a panel of 16 neuroblastoma cell lines

| <b>COSMIC</b> | <b>Cell_line</b> | <b>tissue</b> | <b>tissue2</b> | <b>IBL-302</b> | <b>IBL-302 IC50</b> |
|---------------|------------------|---------------|----------------|----------------|---------------------|
| 910780        | TGW              | neuroblastoma | neuroblastoma  | -4,30443       | 0,013508583         |
| 949178        | NB14             | neuroblastoma | neuroblastoma  | -4,14914       | 0,01577798          |
| 949172        | NB12             | neuroblastoma | neuroblastoma  | -3,5086        | 0,029938799         |
| 717431        | SK-N-SH          | neuroblastoma | neuroblastoma  | -3,0848        | 0,045739181         |
| 906820        | CHP-212          | neuroblastoma | neuroblastoma  | -3,03868       | 0,047898073         |
| 949174        | NB7              | neuroblastoma | neuroblastoma  | -2,94588       | 0,05255579          |
| 753616        | BE2-M17          | neuroblastoma | neuroblastoma  | -2,44057       | 0,087111184         |
| 908447        | NH-12            | neuroblastoma | neuroblastoma  | -2,40332       | 0,090417269         |
| 949177        | NB13             | neuroblastoma | neuroblastoma  | -2,39882       | 0,090825064         |
| 906875        | GOTO             | neuroblastoma | neuroblastoma  | -2,36045       | 0,094377744         |
| 907170        | IMR-5            | neuroblastoma | neuroblastoma  | -2,35987       | 0,094432499         |
| 753618        | KELLY            | neuroblastoma | neuroblastoma  | -2,2075        | 0,109975243         |
| 1240181       | NB(TU)1-10       | neuroblastoma | neuroblastoma  | -1,91249       | 0,147712125         |
| 688087        | SK-N-FI          | neuroblastoma | neuroblastoma  | -1,78474       | 0,167840694         |
| 949179        | NB1              | neuroblastoma | neuroblastoma  | -1,48075       | 0,227467024         |
| 724828        | SK-N-AS          | neuroblastoma | neuroblastoma  | -0,12902       | 0,878956386         |
