# Supplementary material for: Anti‐tumor effects of PIM/PI3K/mTOR triple kinase inhibitor IBL‐302 in neuroblastoma
Source: PubMed Central journal article supplement (PMC6685085; doi:10.15252/emmm.201810058), 2019-07-16
Supplement: EMMM-11-e10058-s002.pdf [file EMMM-11-e10058-s002.pdf]

## Expanded View Figures

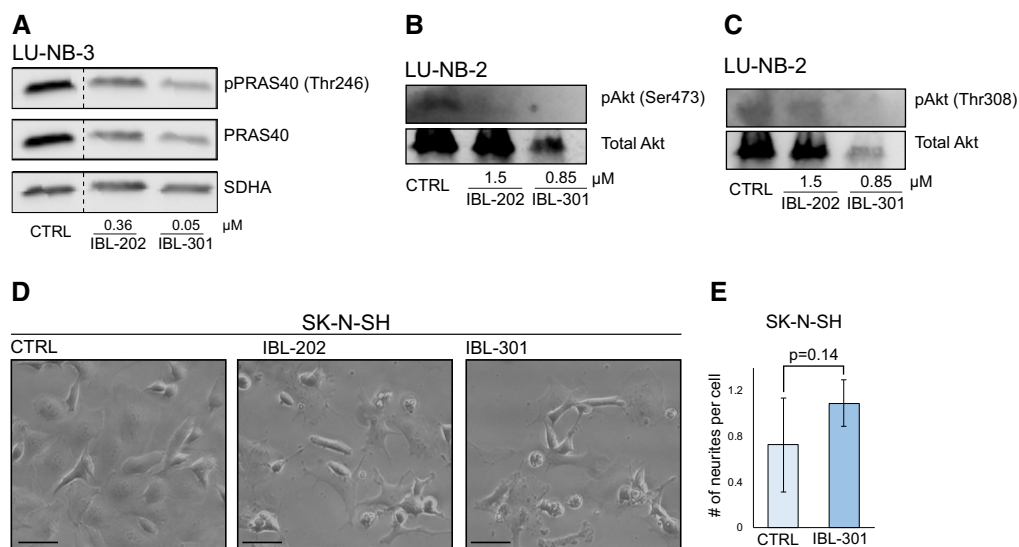

**Figure EV1. Multikinase inhibitors target downstream signaling pathways.**

A–C Western blot analyses of downstream signaling protein pPRAS40 (A), pAkt(Ser473) (B), and pAkt(Thr308) (C) expression in LU-NB-3 and LU-NB-2 PDX cells after treatment with IBL-202 or IBL-301 at indicated concentrations for 48 h. PRAS40, total Akt, and SDHA levels were used as loading controls.

D Brightfield photomicrographs of SK-N-SH cells treated with 0.36  $\mu$ M IBL-202 or 0.05  $\mu$ M IBL-301 for 48 h. Scale bars represent 100  $\mu$ m.

E Quantification of neurite outgrowth presented as number of neurites/cell in SK-N-SH cells treated with 0.05  $\mu$ M IBL-301. Representative areas ( $n = 4$  and  $n = 7$  for CTRL and IBL-301, respectively) were used, and  $n = 249$  and  $n = 245$  cells/condition for CTRL and IBL-301, respectively, were counted. Values are reported as mean  $\pm$  SEM. Statistical significance was determined by two-sided Student's *t*-test.  $P = 0.14$ .

Source data are available online for this figure.

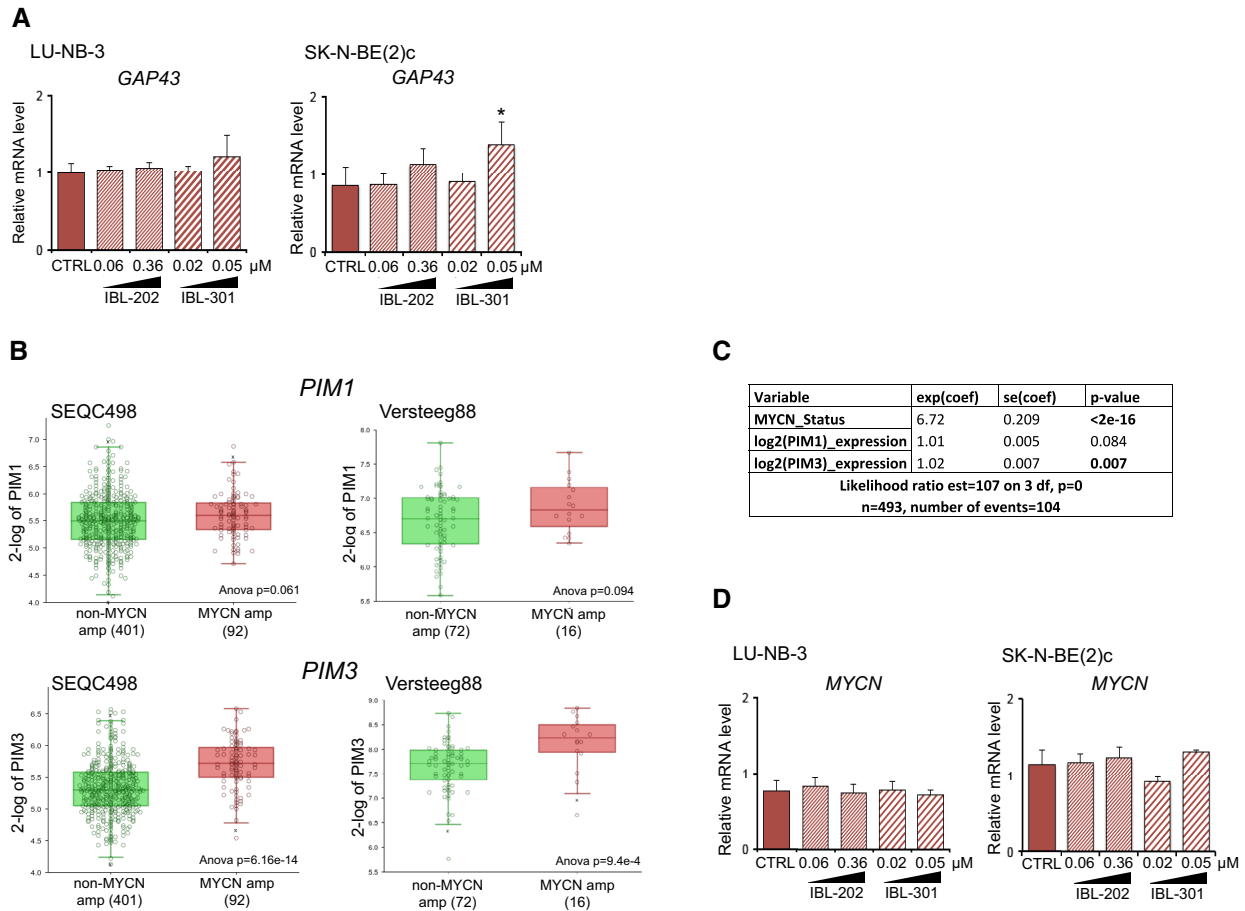

**Figure EV2. PIM3 is expressed at higher levels in MYCN-amplified tumors.**

- A Relative mRNA expression levels of *GAP43* in LU-NB-3 and SK-N-BE(2)c cells treated with IBL-202 or IBL-301 at indicated concentrations for 48 h as determined by qRT-PCR. Mean values from three biologically independent experiments. Error bars represent SEM. Statistical significance was determined by one-way ANOVA. \* $P = 0.013$ .
- B *PIM1* and *PIM3* expression in non-MYCN-amplified vs. MYCN-amplified tumors in publicly available datasets SEQC498 (left panels) and Versteeg88 (right panels). Horizontal bands are the median line; the upper part of the box is the 1<sup>st</sup> quartile and the lower box is the 3<sup>rd</sup> quartile; the error bars are the maximum and minimum values excluding outliers; the X symbols are mean values.
- C Determination of *PIM1* and *PIM3* MYCN dependence through multivariate cox regression analysis in publicly available dataset SEQC498. The text in the lowest row in this Table is random and not everything is included.
- D Relative mRNA expression levels of *MYCN* in LU-NB-3 and SK-N-BE(2)c cells treated with IBL-202 or IBL-301 at indicated concentrations for 48 h as determined by qRT-PCR. Mean values from three biologically independent experiments. Error bars represent SEM. Statistical significance was determined by one-way ANOVA. No asterisk indicates no significance.

**Figure EV3. Combined targeting of PIM, PI3K, and mTOR is more efficient than single-target treatment.**

- A–C LU-NB-3 PDX cells treated with PI-103 (PI3K inhibitor, Number of replicates; A), PP242 (mTORC1/2 inhibitor; B), or AZD1208 (PIM inhibitor; C) at indicated concentrations. Cell viability determined by CellTiter-Glo. Values are reported as mean  $\pm$  SEM ( $n = 2$ ).
- D LU-NB-3 PDX cells treated with 0.13  $\mu$ M PI-103, 10.2  $\mu$ M PP242, 0.1  $\mu$ M AZD1208, or the combination of all three inhibitors. Cell death determined by Annexin V assay and flow cytometry.
- E Quantification of live and dead cells from (D). Live cells = PI negative, dead cells = PI positive. Mean values from two biologically independent experiments. Error bars represent SEM.
- F Treatment of SK-N-AS or SK-N-FI neuroblastoma cells with 50–500 nM IBL-302, 100–1,000 nM PI-103, or 10–1,000 nM dactolisib. Cell viability determined by CellTiter-Glo. Values are reported as mean  $\pm$  SEM ( $n = 3$ ).
- G Tumor size of SK-N-AS xenograft mice treated with IBL-302 or dactolisib for indicated amount of days (until first mouse in each group reached maximum tolerated tumor volume). Mice were randomly allocated to either of the three groups ( $n = 7$ , CTRL;  $n = 8$ , IBL-302;  $n = 8$ , dactolisib). Values are reported as mean  $\pm$  SEM. Statistical analysis was performed at day 11 when all mice included in the study were alive; ANOVA  $P = 0.5518$ .

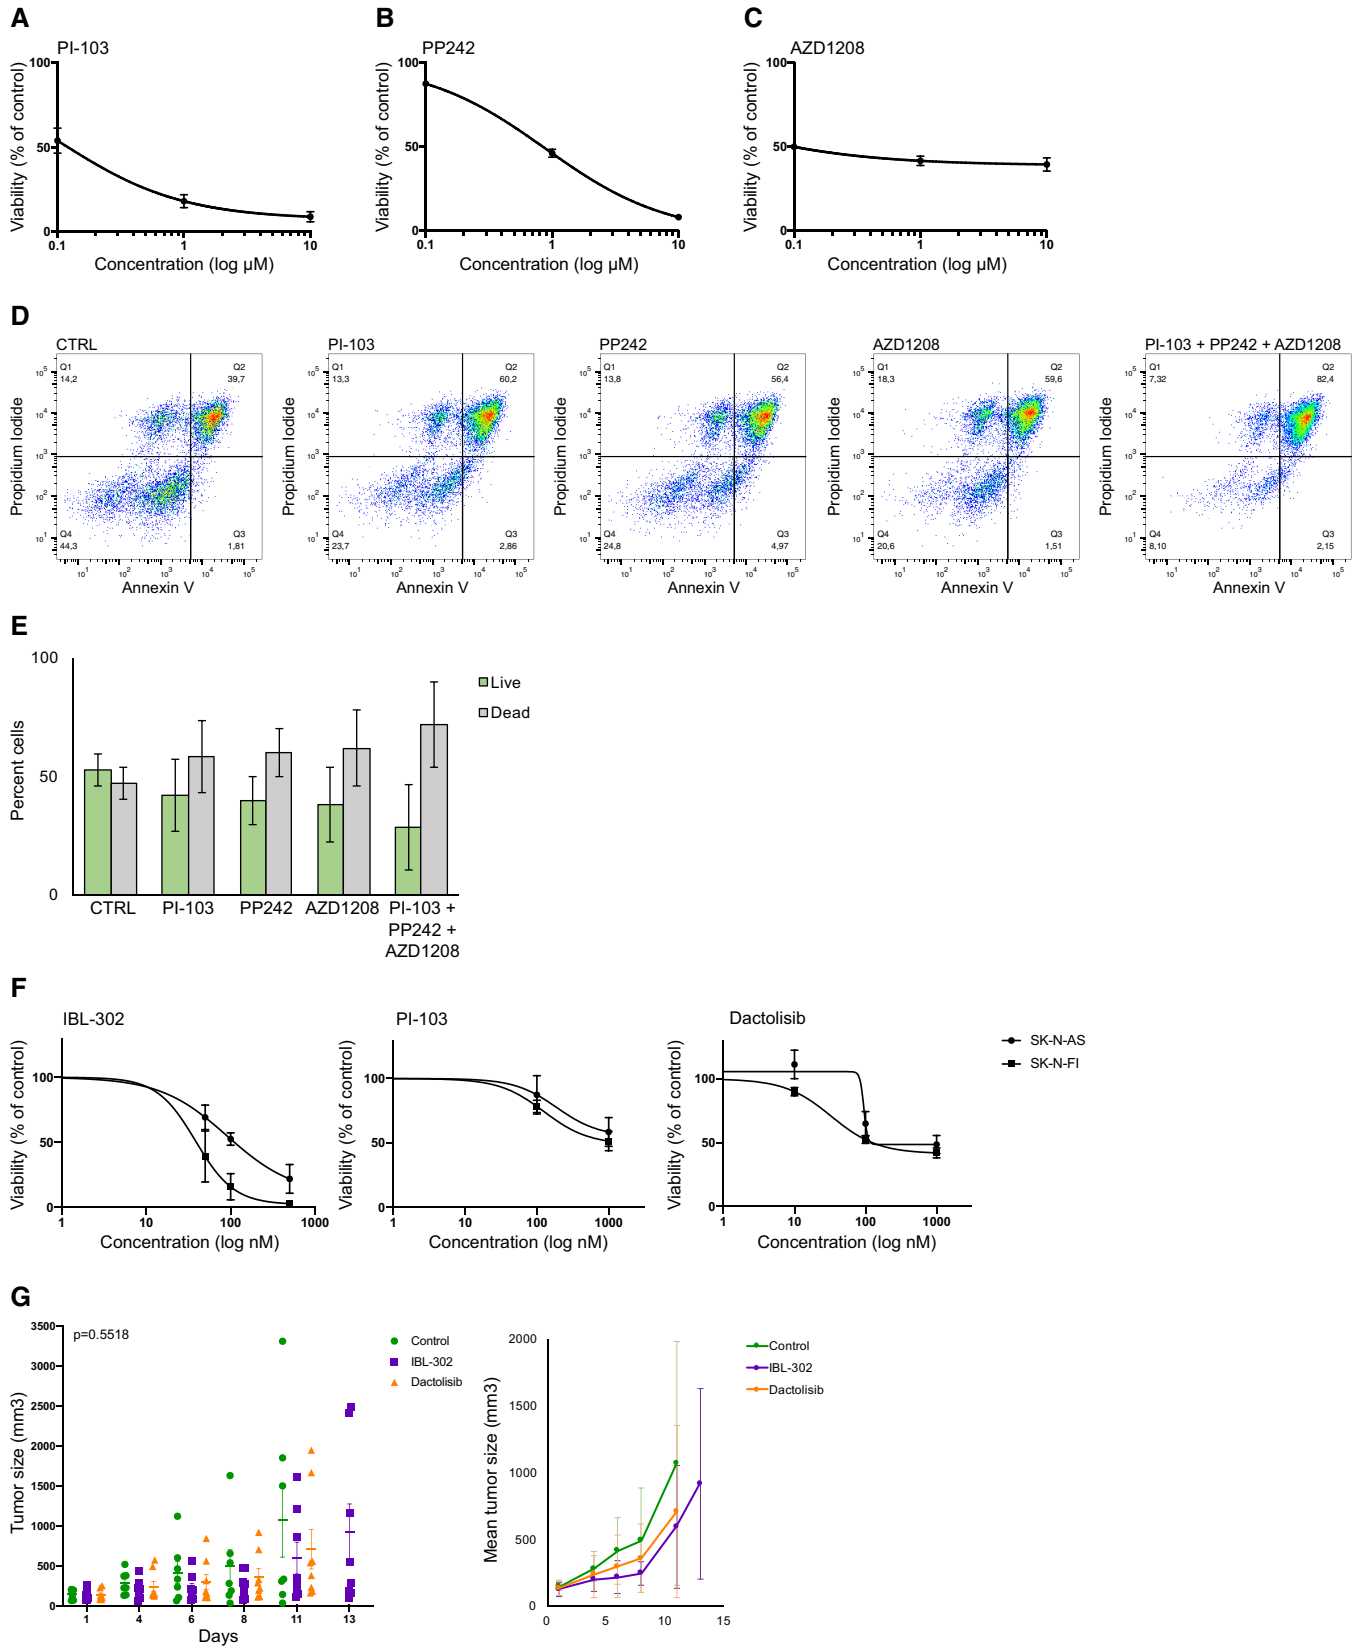

Figure EV3.

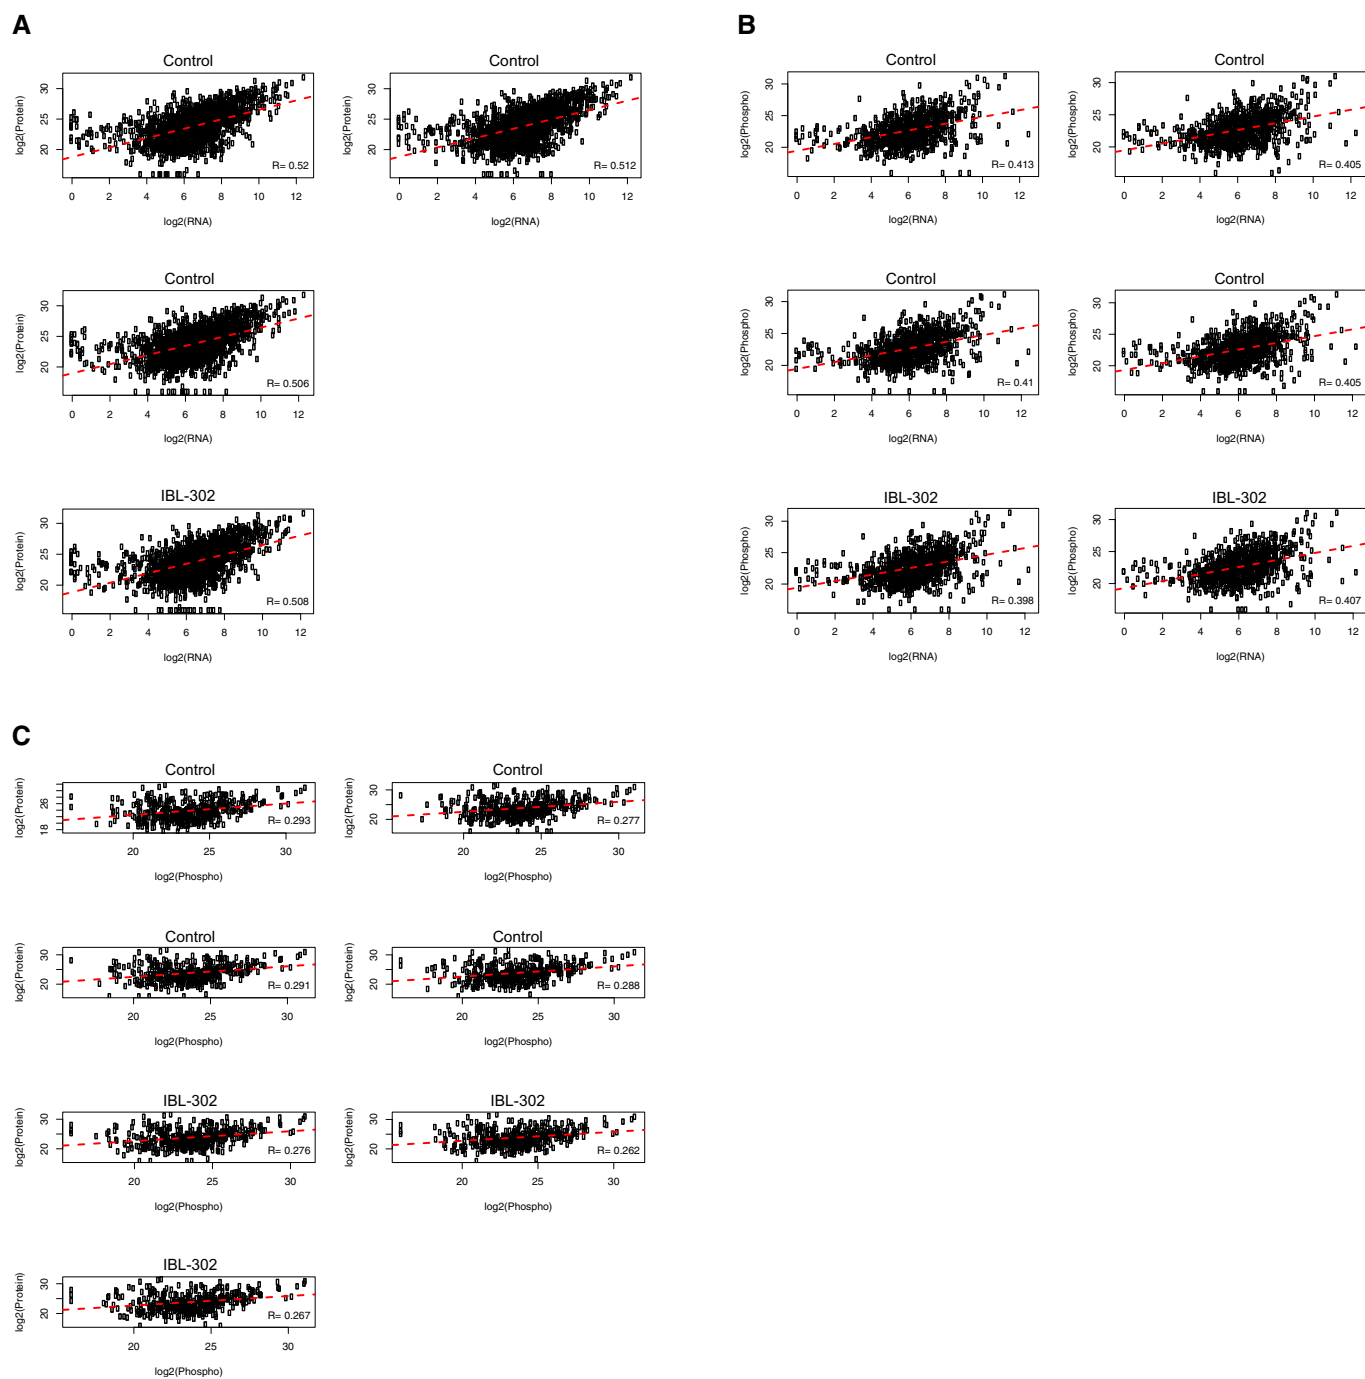

**Figure EV4. Correlations between RNA, protein, and phospho-protein expression.**

A–C Cross-platform sample correlation of expression levels between RNAseq and mass spectrometry (A), RNAseq and mass spectrometry phospho-proteome (B), and mass spectrometry proteome and mass spectrometry phospho-proteome (C) data. Pearson's correlation coefficients are displayed.
