# Supplementary material for: Anti‐tumor effects of PIM/PI3K/mTOR triple kinase inhibitor IBL‐302 in neuroblastoma
Source: PubMed Central journal article supplement (PMC6685085; doi:10.15252/emmm.201810058), 2019-07-16

For figure 4

Casp3

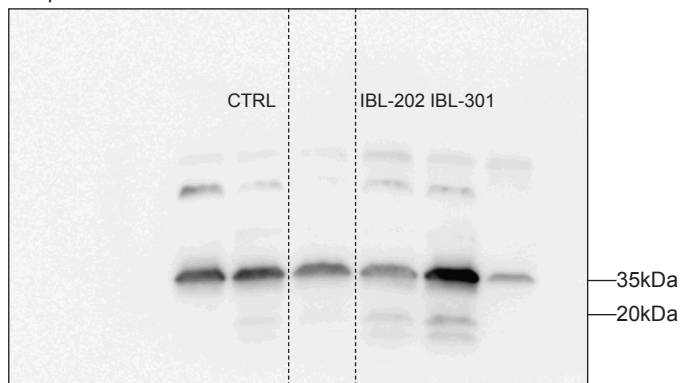

SDHA

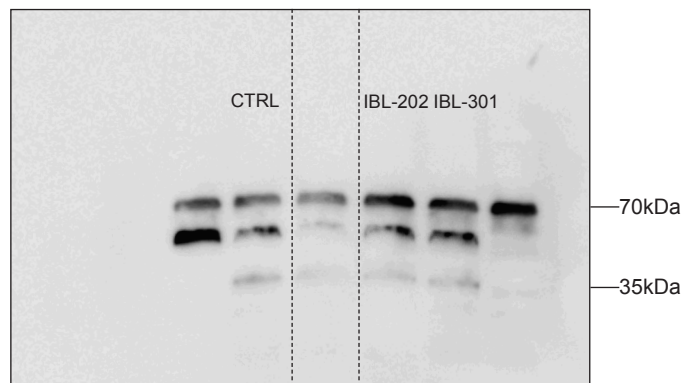

Supplement: EMMM-11-e10058-s005.pdf [file EMMM-11-e10058-s005.pdf]
